# Supplementary material for: Water-soluble sulfonated phosphorus(v) corrolazines and porphyrazines: the effect of macrocycle contraction and pyrazine ring fusion on spectral, acid–base and photophysical properties
Source: Royal Society of Chemistry journal article supplement (doi:10.1039/d1dt02453a), 2021-12-03
Supplement: d1dt02453a1.pdf [file d1dt02453a1.pdf]

## ***Supporting information***

### **Water-soluble Sulfonated Phosphorus(v) Corrolazines and Porphyrazines: Effect of Macrocycle Contraction and Pyrazine Ring Fusion on Spectral, Acid-base and Photophysical Properties**

*Svetlana Ivanova,<sup>a</sup> Denis S. Salnikov,<sup>a</sup> Gleb Knorr,<sup>a</sup> Olesja Ledovich,<sup>a</sup> Valerij Sliznev,<sup>a</sup> Pavel Kubat,<sup>b</sup> Veronika Novakova,<sup>\*c</sup> and Pavel A. Stuzhin<sup>\*a</sup>*

---

<sup>a</sup> *Institute of Macroheterocycles, Ivanovo State University of Chemistry and Technology, 153000 Ivanovo, Russia, e-mail: stuzhin@isuct.ru*

<sup>b</sup> *J. Heyrovsky Institute of Physical Chemistry, Czech Academy of Sciences, 182 23 Prague, Czech Republic.*

<sup>c</sup> *Faculty of Pharmacy in Hradec Kralove, Charles University, Hradec Kralove, 500 05 Czech Republic.*

#### **Content**

|             |                                                      |                      |
|-------------|------------------------------------------------------|----------------------|
| <b>I.</b>   | <b>Spectral characterization.....</b>                | <b>pages 2-6</b>     |
| <b>II.</b>  | <b>Photophysical measurements in water solutions</b> | <b>pages 7-9</b>     |
| <b>III.</b> | <b>DFT calculations .....</b>                        | <b>pages 10 - 22</b> |

## I. Spectral characterization

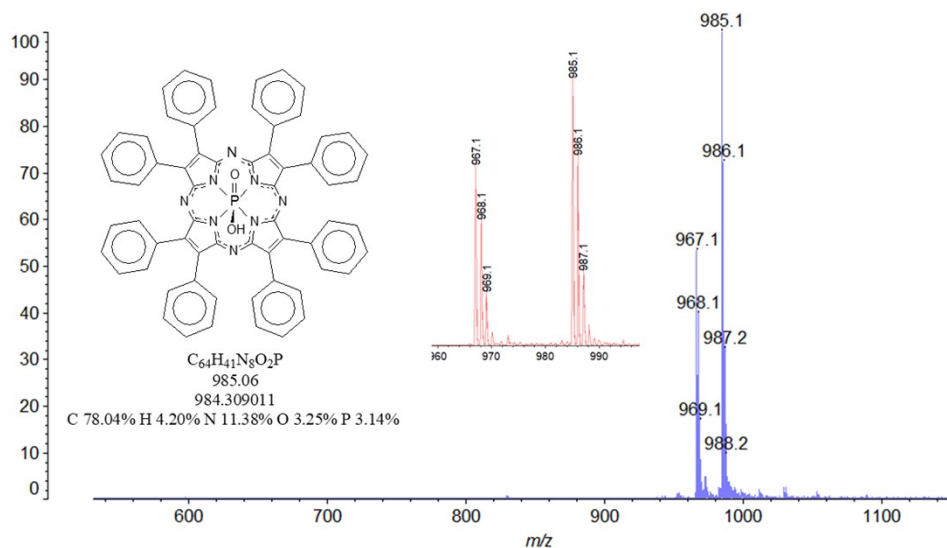

Figure S1-A. MALDI mass-spectra of P(V) porphyrazine complexes **3a**

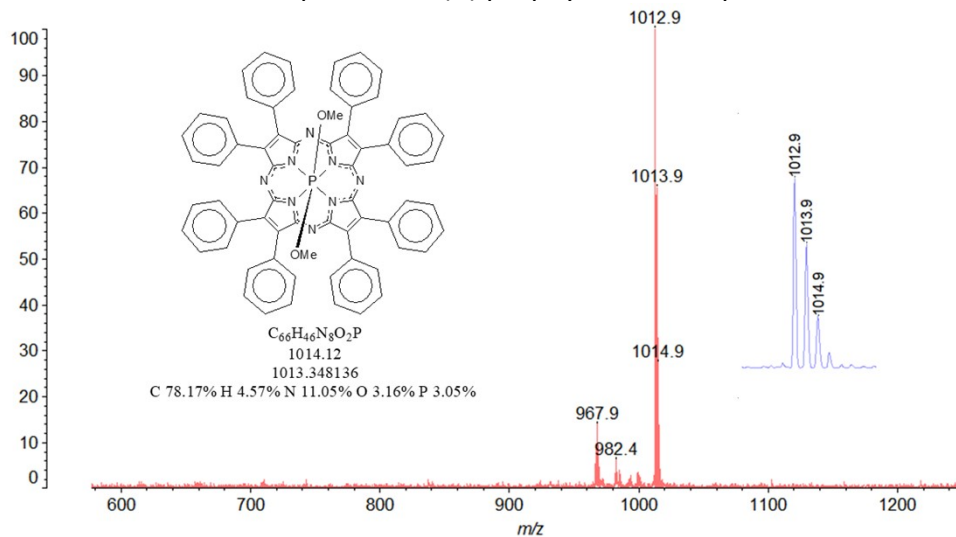

Figure S1-B. MALDI mass-spectra of P(V) porphyrazine complexes **3b**

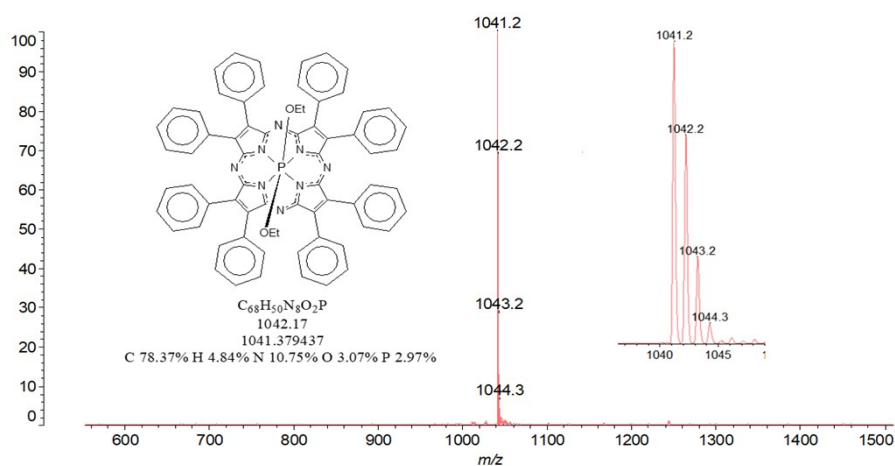

Figure S1-C. MALDI mass-spectra of P(V) porphyrazine complexes **3c**

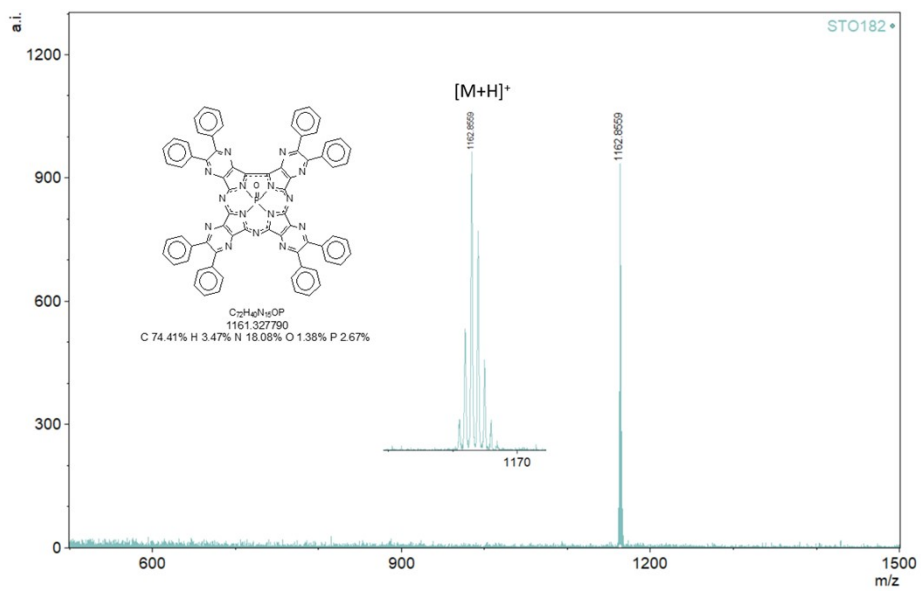

**Figure S2-A.** MALDI mass-spectra of P(V) tetrapyrazinocorrolazine complexes **5a**

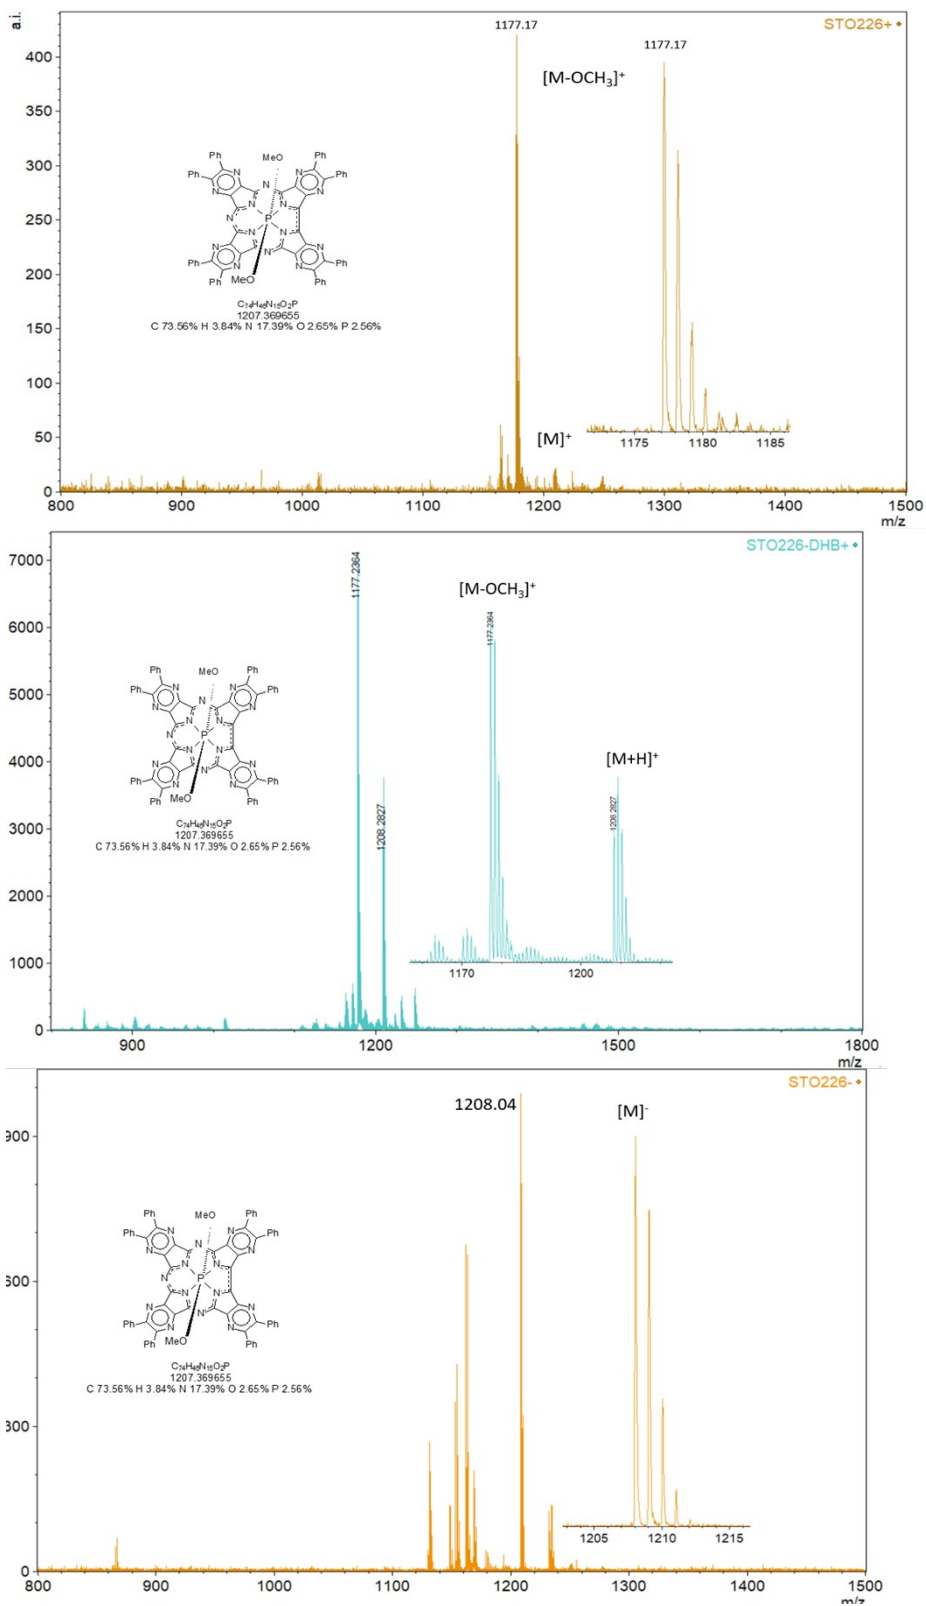

**Figure S2-B.** MALDI mass-spectra of P(V) tetrapyrazinocorrolazine complexes **5b**

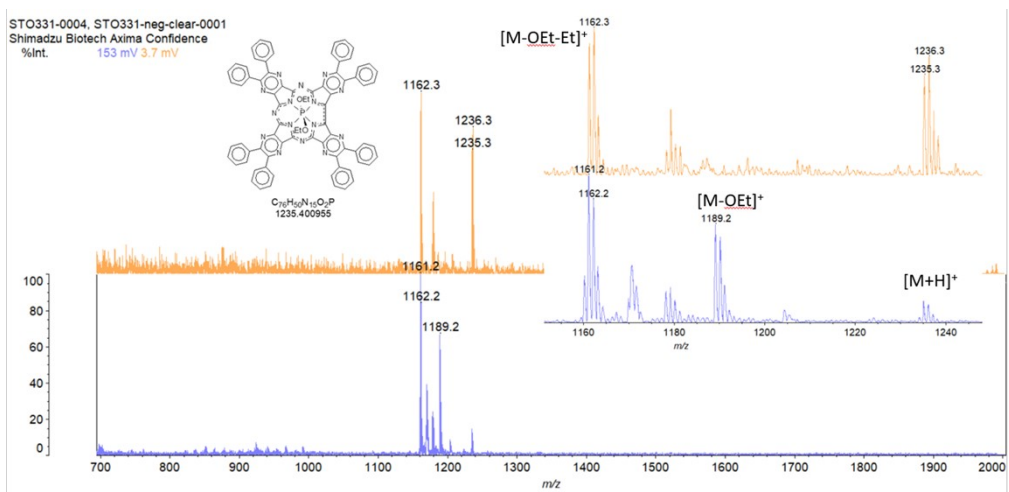

Figure S2-C. MALDI mass-spectra of P(V) tetrapyrazinocorrolazine complexes **5c**.

Shimadzu Biotech Axima Confidence 2.9.3.20110624: Mode Reflectron\_neg, Power: 105, Blanked, P.Ext. @ 1600 (bin 77)  
 %Int. 6.5 mV[sum= 2259 mV] Profiles 1-350 Smooth Av 5 -Baseline 20

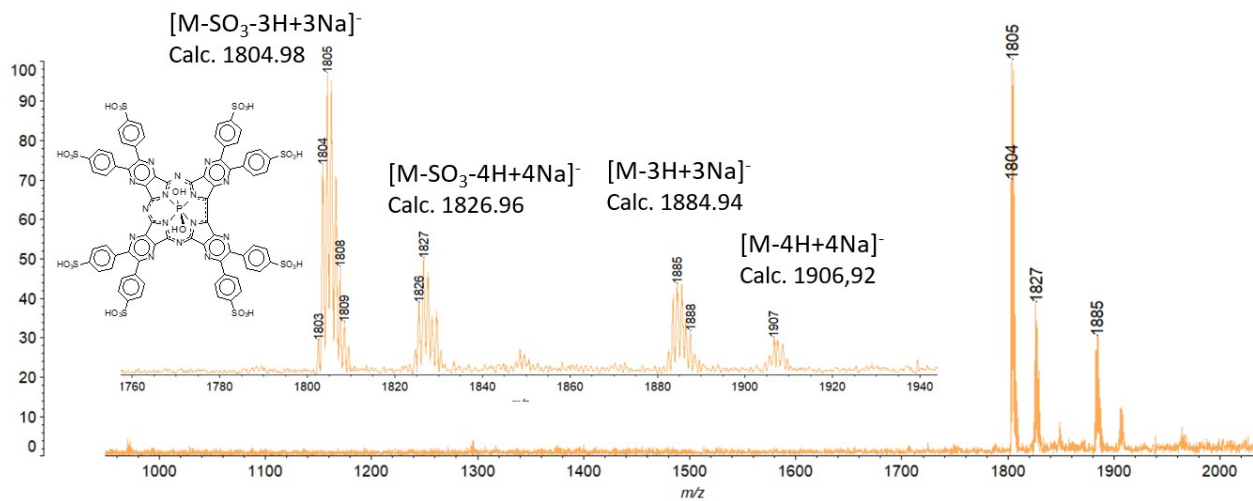

Figure S3. MALDI mass-spectrum of sulfonated P(V) tetrapyrazinoporphyrazine complex **8**.

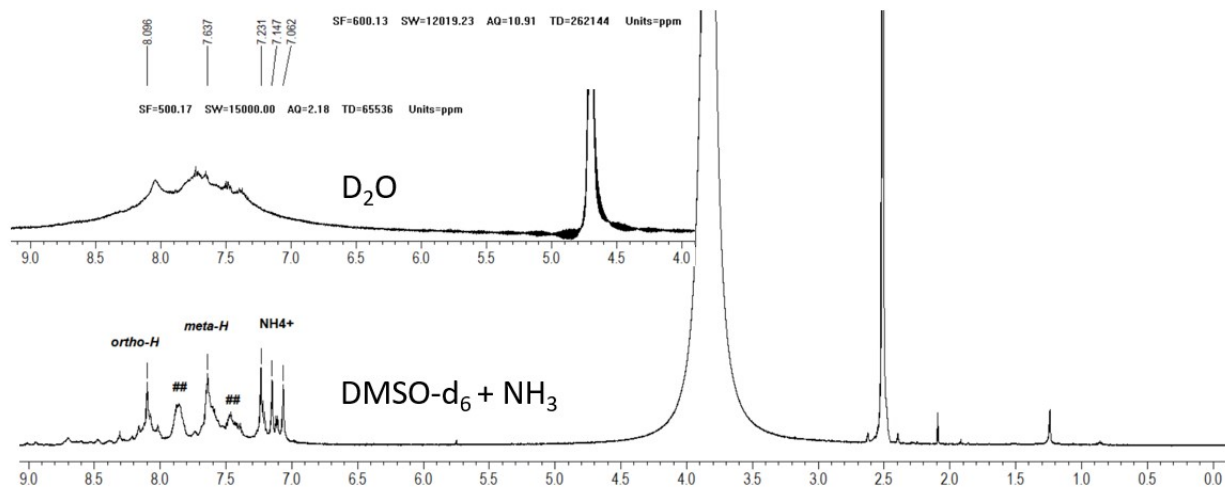

**Figure S4.** <sup>1</sup>H NMR spectrum of sulfonated P(V) tetrapyrazinoporphyrazine complex **8** in D<sub>2</sub>O (~3 mM) and in DMSO-d<sub>6</sub> with addition of NH<sub>3</sub>. Resonance signals of associates are marked by ##.

SF=202.47 SW=163043.48 AQ=0.20 TD=65536 Units=ppm

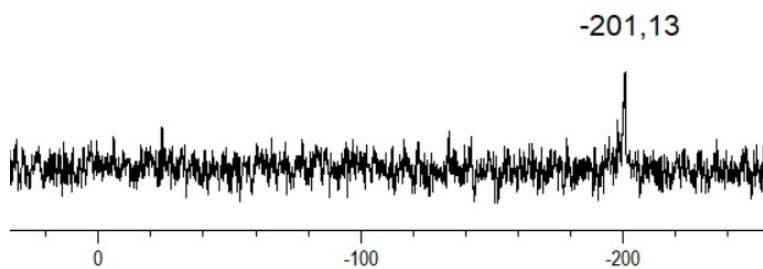

**Figure S5.** <sup>31</sup>P NMR spectrum of sulfonated P(V) tetrapyrazinoporphyrazine complex **8** in D<sub>2</sub>O

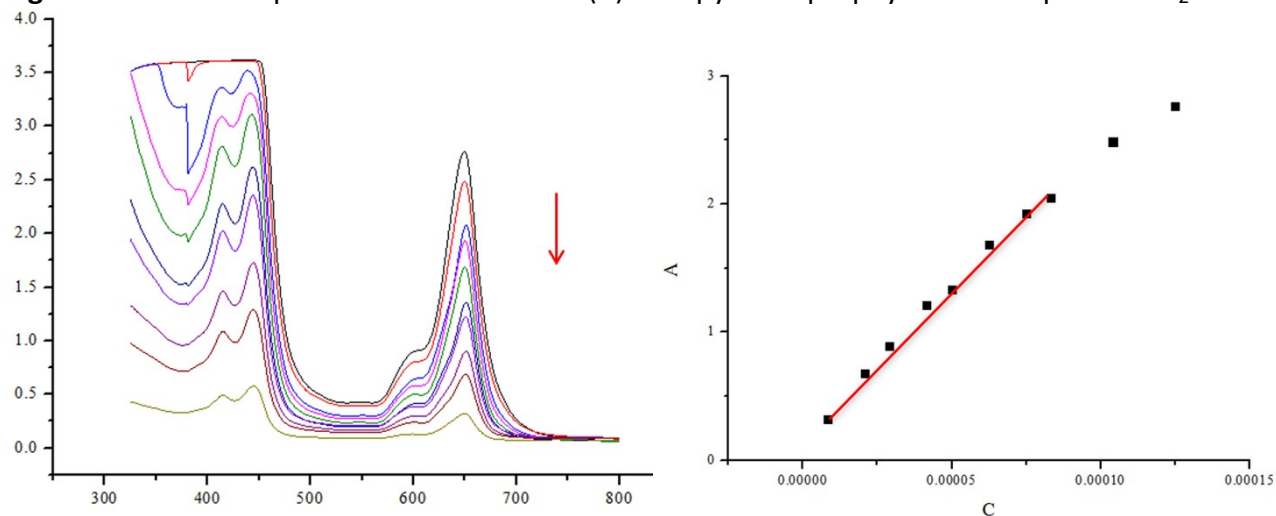

**Figure S6.** Concentration dependence of the UV-VIS spectra for sulfonated P(V) tetrapyrazinoporphyrazine complex **8**.

## II. Photophysical measurements in water solutions

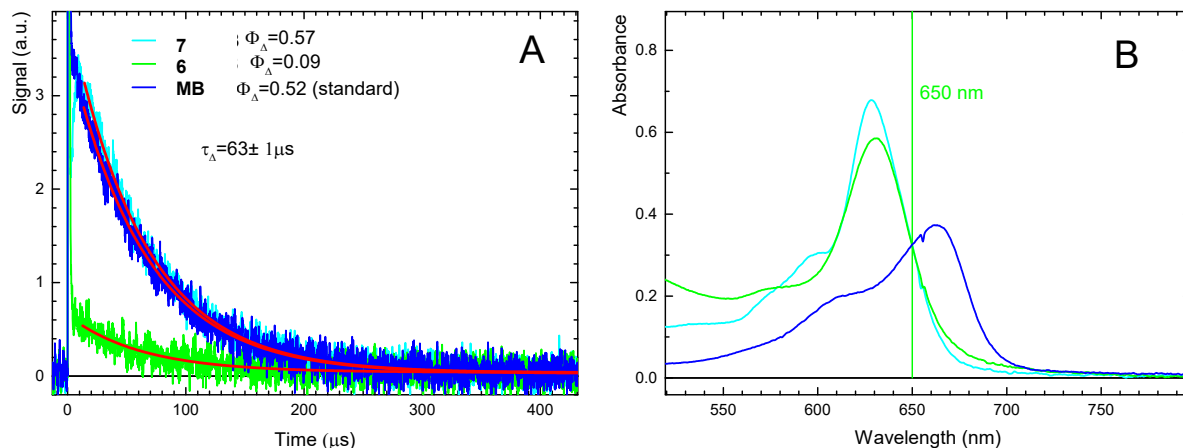

**Figure S7.** Panel A: Comparison of singlet oxygen phosphorescence generated from of **6**, **7** and methylene blue (**MB**) (absorbance at 650 nm is 0.324) in  $\text{D}_2\text{O}$ . Excited by 650 nm. Panel B: Visible spectra of **6**, **7** (with background correction) and **MB** (standard) in  $\text{D}_2\text{O}$  used for calculation of  $\Phi_{\Delta}$ .

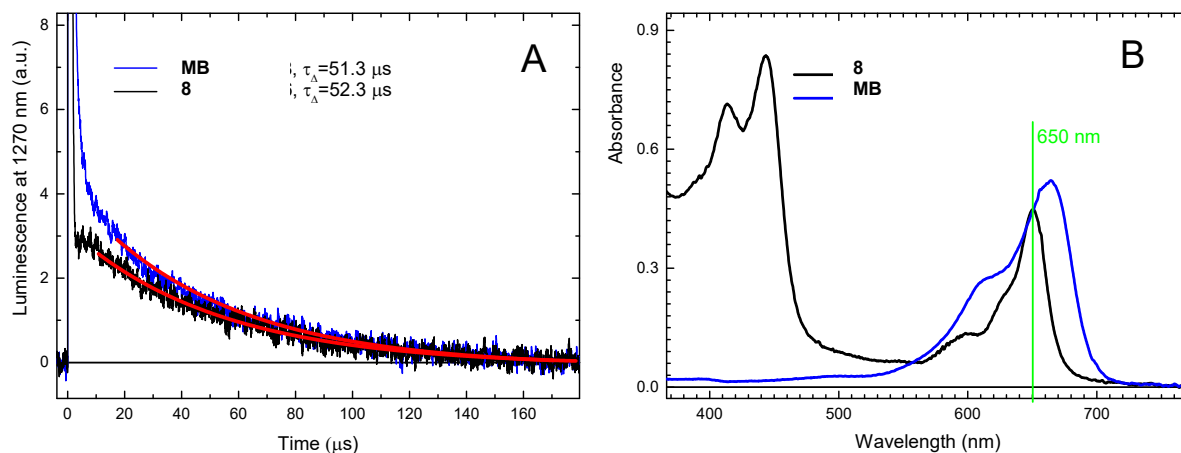

**Figure S8.** Panel A: Comparison of singlet oxygen phosphorescence generated from **8** (absorbance at 650 nm 0.448) and **MB** (absorbance at 650 nm 0.444) in  $\text{D}_2\text{O}$ . Excited by 650 nm. Panel B: Visible spectra of **8** and **MB** (standard) in  $\text{D}_2\text{O}$  used for calculation of  $\Phi_{\Delta}$ .

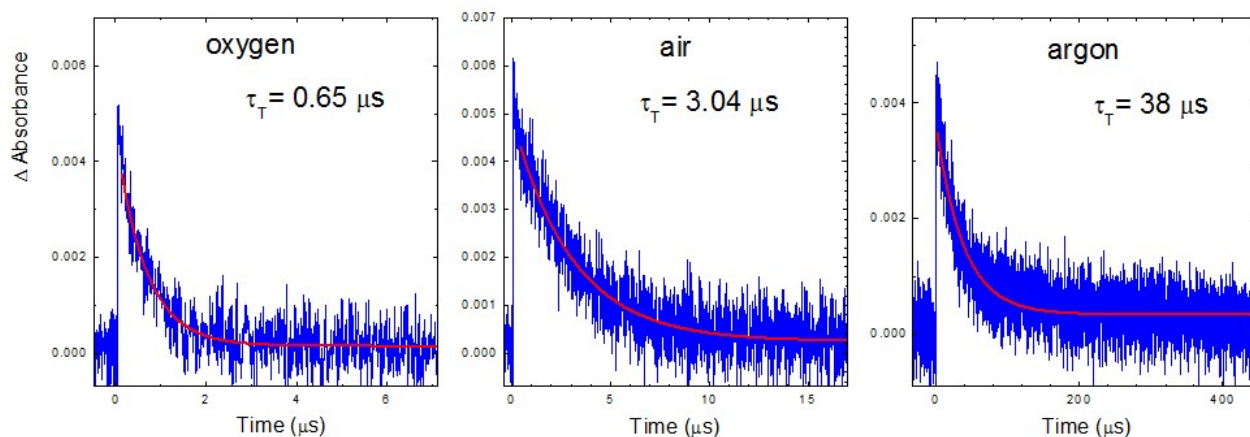

**Figure S9.** Kinetics of the triplet states of **6** in oxygen-, air-, and argon saturated  $\text{D}_2\text{O}$  measured by transient absorption at 500 nm after excitation by dye laser at 650 nm.

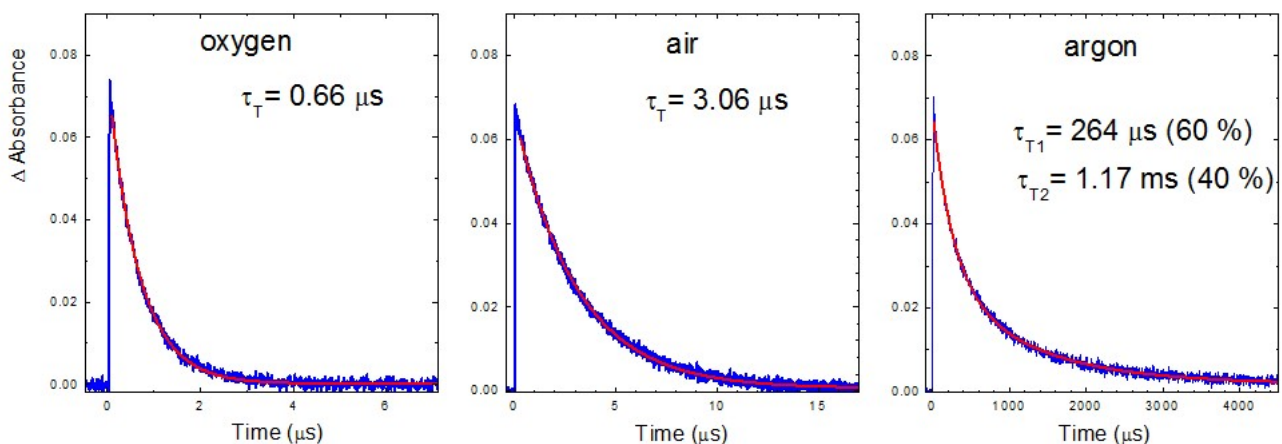

**Figure S10.** Kinetics of the triplet states of **7** in oxygen-, air-, and argon saturated  $\text{D}_2\text{O}$  measured by transient absorption at 500 nm after excitation by dye laser at 650 nm.

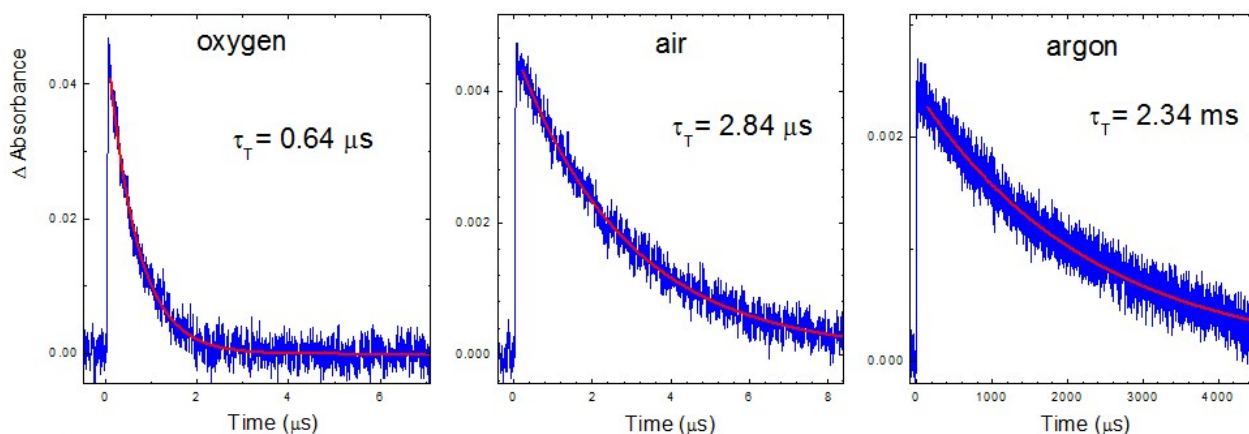

**Figure S11.** Kinetics of the triplet states of **8** in oxygen-, air-, and argon saturated  $\text{D}_2\text{O}$  measured by transient absorption at 500 nm after excitation by dye laser at 650 nm.



# Methylene Blue

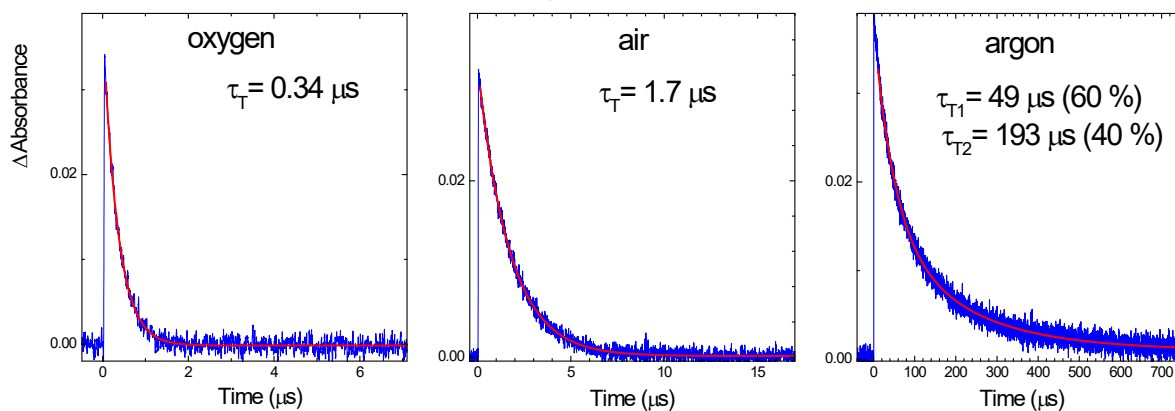

**Figure S12.** Kinetics of the triplet states of MB in oxygen-, air-, and argon saturated D<sub>2</sub>O measured by transient absorption at 420 nm after excitation by dye laser at 650 nm.

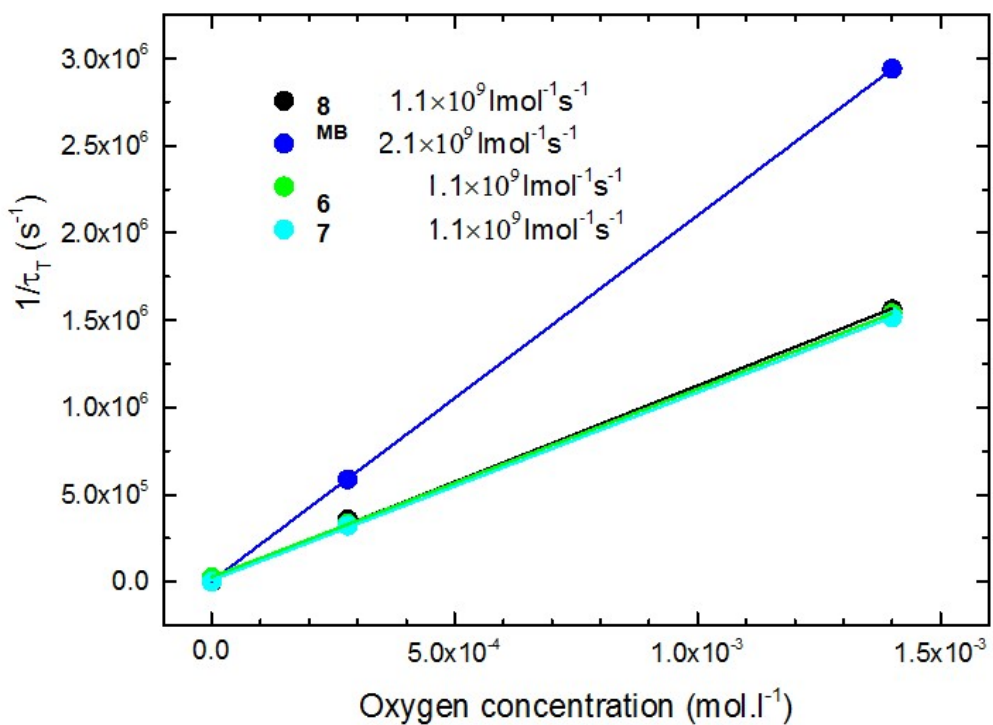

**Figure S13.** Quenching of the triplet states of 6, 7, 8 and MB (standard) by oxygen

### III. DFT calculations results

#### Computational procedure

Calculations of the molecular and electronic structures were accomplished by the electron density functional method with DFT/B3LYP [1,2,3] using the Firefly 8 program [4] which is partly based on the initial code of the GAMESS (US) program [5]. For all atoms, correlation-consistent triple-zeta (cc-pvtz) basis sets [6] were used. The exponents and contracting ratios were taken from the database [7]. Geometric parameters of all considered configurations were optimized using a gradient method. For the optimized structures, force field constants were obtained and normal mode frequencies and band intensities in the IR spectra were calculated in harmonic approximation using the numerical method implemented in the Firefly 8 program [4,5]. The energies of the vertical electronic transitions and oscillator strengths were calculated for the **optimized** geometries by the TD DFT method [8] without consideration of the excitations from the molecular orbitals corresponding to the 1s-orbitals of C and N and 1s-, 2s-, 2p orbitals of S (frozen core approximation).

1. A. D. Becke, *J. Chem. Phys.*, 1993, **98**, 5648-5642.
2. P. J. Stephens, F. J. Devlin, C. F. Chablowski and M. J. Frisch, *J. Phys. Chem.*, 1994, **98**, 11623-11627.
3. R. H. Hertwig and W. Koch, *Chem. Phys. Lett.*, 1997, **268**, 345-351.
4. A. A. Granovsky, Firefly version 8, [www http://classic.chem.msu.su/gran/firefly/index.html](http://classic.chem.msu.su/gran/firefly/index.html).
5. M. W. Schmidt, K. K. Baldrige, J. A. Boatz, S. T. Elbert, M. S. Gordon, J. H. Jensen, S. Koseki, N. Matsunaga, K. A. Nguyen, S. J. Su, T. L. Windus, M. Dupuis and J. A. Montgomery, *J. Comput. Chem.*, 1993, **14**, 1347-1363.
6. T. H. Dunning, *J. Chem. Phys.*, 1989, **90**, 1007-1023. DOI: 10.1063/1.456153.
7. The Extensible Computational Chemistry Environment Basis Set Database, Version 6/19/03 (by the Molecular Science Computing Facility, Environmental and Molecular Sciences Laboratory).
8. Y. Towada, T. Tsuneda, S. Yanagisawa, Y. Yanai and K. Hirao, *J. Chem. Phys.*, 2004, **120**, 8425-8433.

#### For the optimized structures the following data are presented:

- Calculated (TDDFT) wavelengths ( $\lambda$ , in nm) and oscillator strengths (in parentheses) corresponding to the energies of the transition from the ground state <sup>\*</sup> to the nearest excited electronic states. <sup>\*\*</sup>) the weight (%) of the Slater determinant in the wave function of the excited electronic state is indicated in parentheses.
  - Cartesian coordinates (Å):
- TOTAL ENERGY
  - Frequencies ( $\omega_i$  – cm<sup>-1</sup>) and IR intensities ( $A_i$  – D<sup>2</sup>\*amu/Å<sup>2</sup>)
  - The electronic absorption spectrum (TDDFT calculation):  $\Delta E$  – excitation energy (eV),  $\lambda$  - wave length (nm),  $f$  – oscillator strength

# 1. [CAP (OH)<sub>2</sub>]

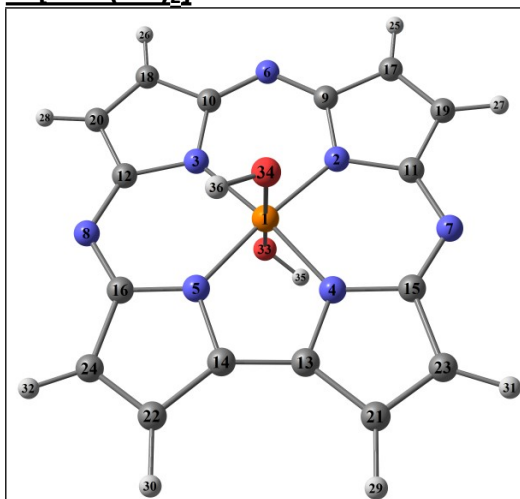

| State             | Composition**)                                                                                                                                                                                                                                                                   | $\lambda$  |
|-------------------|----------------------------------------------------------------------------------------------------------------------------------------------------------------------------------------------------------------------------------------------------------------------------------|------------|
|                   | ...(41b) <sup>2</sup> (44a) <sup>2</sup> (42b) <sup>2</sup> (45a) <sup>2</sup> (43b) <sup>2</sup> (46a) <sup>2</sup> (47a) <sup>2</sup> (44b) <sup>2</sup> (45b) <sup>2</sup> (48a) <sup>2</sup> (49a) <sup>0</sup> (46b) <sup>0</sup> (47b) <sup>0</sup> (50a) <sup>0</sup> ... |            |
| 1 <sup>1</sup> A  | 48a→49a(80); 45b→46b(19)                                                                                                                                                                                                                                                         | 512(0.122) |
| 3 <sup>1</sup> B  | 48a→46b(38); 45b→49a(33); 44b→49a(20)                                                                                                                                                                                                                                            | 364(0.420) |
| 4 <sup>1</sup> B  | 44b→49a(77); 45b→49a(11)                                                                                                                                                                                                                                                         | 360(0.115) |
| 5 <sup>1</sup> A  | 47a→49a(64); 45b→46b(27)                                                                                                                                                                                                                                                         | 350(0.129) |
| 6 <sup>1</sup> A  | 45b→46b(48); 47a→49a(29); 48a→49a(15)                                                                                                                                                                                                                                            | 340(0.448) |
| 11 <sup>1</sup> B | 43b→49a(45); 47a→46b(39)                                                                                                                                                                                                                                                         | 307(0.171) |
| 16 <sup>1</sup> A | 43b→46b(91)                                                                                                                                                                                                                                                                      | 272(0.106) |
| 19 <sup>1</sup> B | 48a→47b(79); 41b→48a(17)                                                                                                                                                                                                                                                         | 260(0.113) |

## Cartesian coordinates (Å):

| Atom | X               | Y               | Z               |
|------|-----------------|-----------------|-----------------|
| P1   | 0.000000000000  | 0.000000000000  | 0.050091267132  |
| N2   | 1.330116452063  | 0.104849107382  | 1.257133256439  |
| N3   | -1.330116452063 | -0.104849107382 | 1.257133256439  |
| N4   | 1.183242990790  | 0.152584345531  | -1.297436728456 |
| N5   | -1.183242990790 | -0.152584345531 | -1.297436728456 |
| N6   | 0.000000000000  | 0.000000000000  | 3.268188356051  |
| N7   | 3.286442672342  | 0.224026824449  | -0.193176199992 |
| N8   | -3.286442672342 | -0.224026824449 | -0.193176199992 |
| C9   | 1.150761119465  | 0.080227378793  | 2.622318077250  |
| C10  | -1.150761119465 | -0.080227378793 | 2.622318077250  |
| C11  | 2.695215605322  | 0.180961038091  | 0.985910948021  |
| C12  | -2.695215605322 | -0.180961038091 | 0.985910948021  |
| C13  | 0.701071355163  | 0.073201385987  | -2.576237780199 |
| C14  | -0.701071355163 | -0.073201385987 | -2.576237780199 |
| C15  | 2.547834272323  | 0.191960585023  | -1.299471900234 |
| C16  | -2.547834272323 | -0.191960585023 | -1.299471900234 |
| C17  | 2.445214862910  | 0.154991684123  | 3.239637334143  |
| C18  | -2.445214862910 | -0.154991684123 | 3.239637334143  |
| C19  | 3.376539536189  | 0.214386727731  | 2.251104296131  |
| C20  | -3.376539536189 | -0.214386727731 | 2.251104296131  |
| C21  | 1.816452260246  | 0.109057073007  | -3.454543413307 |
| C22  | -1.816452260246 | -0.109057073007 | -3.454543413307 |
| C23  | 2.951711182897  | 0.183132825178  | -2.671374871018 |
| C24  | -2.951711182897 | -0.183132825178 | -2.671374871018 |
| H25  | 2.591912106624  | 0.156918713079  | 4.306049160397  |
| H26  | -2.591912106624 | -0.156918713079 | 4.306049160397  |
| H27  | 4.447925523277  | 0.277497272498  | 2.337666432699  |
| H28  | -4.447925523277 | -0.277497272498 | 2.337666432699  |
| H29  | 1.772128059856  | 0.072205168011  | -4.529861228737 |
| H30  | -1.772128059856 | -0.072205168011 | -4.529861228737 |
| H31  | 3.975783394793  | 0.220143451069  | -3.002447055600 |
| H32  | -3.975783394793 | -0.220143451069 | -3.002447055600 |
| O33  | -0.237819360117 | 1.679929294504  | 0.112384903358  |
| O34  | 0.237819360117  | -1.679929294504 | 0.112384903358  |
| H35  | 0.451208106283  | 2.160628565081  | -0.355872482764 |
| H36  | -0.451208106283 | -2.160628565081 | -0.355872482764 |

TOTAL ENERGY = -1490.5624756650 Hartree

-----  
 Frequencies ( $\omega_i$  –  $\text{cm}^{-1}$ ) and IR intensities ( $A_i$  –  $\text{D}^2 \cdot \text{amu}/\text{\AA}^2$ )

| $\omega_i$ | $A_i$   | $\omega_i$ | $A_i$   | $\omega_i$ | $A_i$   | $\omega_i$ | $A_i$   |
|------------|---------|------------|---------|------------|---------|------------|---------|
| 73.36      | 0.02044 | 515.34     | 0.00421 | 913.02     | 0.00775 | 1380.92    | 0.01152 |
| 81.38      | 0.00018 | 552.33     | 0.36998 | 938.71     | 0.00033 | 1408.6     | 0.19148 |
| 90.85      | 0.03119 | 574.41     | 0.58105 | 939.84     | 0.00061 | 1409.23    | 0.09352 |
| 124.97     | 1E-5    | 577.49     | 0.25392 | 1017.19    | 1.58149 | 1450.86    | 1.37958 |
| 126.26     | 0.02105 | 608.59     | 0.00577 | 1034.85    | 0.1886  | 1467.89    | 0.04982 |
| 209.82     | 0       | 656.65     | 0.00384 | 1041.06    | 0.51894 | 1488.45    | 0.00674 |
| 224.74     | 0.06671 | 673.22     | 0.00067 | 1046.87    | 6.28352 | 1489.39    | 0.87795 |
| 224.89     | 0.48838 | 681.6      | 0.00488 | 1056.38    | 0.8305  | 1519.18    | 0.88033 |
| 245.52     | 0.27455 | 697.45     | 0.0032  | 1064.02    | 0.08446 | 1536.97    | 0.73974 |
| 276.09     | 0.26731 | 721.35     | 0.0007  | 1065.07    | 0.66993 | 1544.28    | 0.3949  |
| 288.07     | 0.12278 | 723.92     | 0.38515 | 1074.66    | 3.09943 | 1558.17    | 0.38613 |
| 309.21     | 0.11749 | 731.92     | 0.6346  | 1077.28    | 0.70593 | 1570.8     | 1.65485 |
| 329.57     | 0.09961 | 731.93     | 7E-5    | 1078.42    | 0.21909 | 1574.23    | 0.52927 |
| 345.76     | 0.00579 | 741.05     | 0.08317 | 1097.33    | 3.13544 | 1596.49    | 0.29443 |
| 354.87     | 0.01776 | 750.91     | 0.32211 | 1109.29    | 0.421   | 3238.25    | 0.00014 |
| 367.79     | 0.32015 | 786.52     | 1.29567 | 1110.61    | 3.41128 | 3238.84    | 0.01443 |
| 370.91     | 0.07719 | 795.97     | 0.34862 | 1184.95    | 0.0178  | 3243.63    | 0.00258 |
| 402.35     | 0.10446 | 800.84     | 4.74819 | 1209.67    | 0.02024 | 3243.66    | 0.00075 |
| 418.63     | 0.20641 | 803.76     | 0.03035 | 1215.75    | 0.29712 | 3253.9     | 0.07286 |
| 425.12     | 0.0035  | 808.56     | 0.01724 | 1281.99    | 0.12383 | 3253.9     | 0.01811 |
| 431.36     | 0.00584 | 813.59     | 0.07905 | 1293.59    | 0.70549 | 3260.47    | 0.01027 |
| 450.24     | 0.00393 | 816.56     | 0.12522 | 1299.8     | 0.31197 | 3260.53    | 0.00906 |
| 477.9      | 0.10249 | 822.94     | 0.00538 | 1324.81    | 0.01358 | 3828.26    | 0.02945 |
| 490.78     | 0.09021 | 827.43     | 4.3352  | 1327.17    | 0.09406 | 3828.43    | 1.19499 |
| 495.82     | 0.00049 | 904.4      | 0.07703 | 1352.73    | 0.04873 |            |         |
| 501.39     | 0.03809 | 912.79     | 0.0017  | 1366.37    | 0.07172 |            |         |

The electronic absorption spectrum (TDDFT calculation):  $\Delta E$  – excitation energy (eV),  $\lambda$  - wave length (nm),  $f$  – oscillator strength

| State          | $\Delta E$ | $\lambda$ | $f$       | State          | $\Delta E$ | $\lambda$ | $f$       |
|----------------|------------|-----------|-----------|----------------|------------|-----------|-----------|
| <sup>1</sup> A | 2.4203     | 512.27    | 0.1218058 | <sup>1</sup> A | 4.5580     | 272.02    | 0.1064608 |
| <sup>1</sup> B | 2.5998     | 476.90    | 0.0001180 | <sup>1</sup> A | 4.6792     | 264.97    | 0.0000512 |
| <sup>1</sup> B | 3.4021     | 364.44    | 0.4200273 | <sup>1</sup> A | 4.7197     | 262.69    | 0.0018008 |
| <sup>1</sup> B | 3.4443     | 359.96    | 0.1147690 | <sup>1</sup> B | 4.7733     | 259.75    | 0.1132297 |
| <sup>1</sup> A | 3.5428     | 349.96    | 0.1290496 | <sup>1</sup> B | 4.9902     | 248.46    | 0.0027869 |
| <sup>1</sup> A | 3.6495     | 339.73    | 0.4484154 | <sup>1</sup> B | 5.0215     | 246.91    | 0.0009863 |
| <sup>1</sup> A | 3.7804     | 327.97    | 0.0051768 | <sup>1</sup> A | 5.1492     | 240.79    | 0.0012156 |
| <sup>1</sup> A | 3.8338     | 323.40    | 0.0095464 | <sup>1</sup> B | 5.2148     | 237.75    | 0.0040579 |
| <sup>1</sup> A | 4.0122     | 309.02    | 0.0096833 | <sup>1</sup> B | 5.2537     | 235.99    | 0.0152583 |
| <sup>1</sup> B | 4.0142     | 308.86    | 0.0026584 | <sup>1</sup> A | 5.2609     | 235.67    | 0.0046016 |
| <sup>1</sup> B | 4.0389     | 306.97    | 0.1712068 | <sup>1</sup> A | 5.4229     | 228.63    | 0.0036165 |
| <sup>1</sup> B | 4.0944     | 302.82    | 0.0164471 | <sup>1</sup> A | 5.6583     | 219.12    | 0.0000006 |
| <sup>1</sup> B | 4.2384     | 292.52    | 0.0003305 | <sup>1</sup> A | 5.7546     | 215.45    | 0.0048657 |
| <sup>1</sup> B | 4.3524     | 284.86    | 0.0206353 | <sup>1</sup> B | 5.8050     | 213.58    | 0.0150244 |
| <sup>1</sup> A | 4.4671     | 277.55    | 0.0000876 | <sup>1</sup> B | 5.8808     | 210.83    | 0.0000395 |

## 2. Anion [CAP(O-)(OH)<sub>2</sub>]

|  |                                                                                                                                                                     |                                                                                             |            |
|--|---------------------------------------------------------------------------------------------------------------------------------------------------------------------|---------------------------------------------------------------------------------------------|------------|
|  | State                                                                                                                                                               | Composition **)                                                                             | $\lambda$  |
|  | ... <i>(91a)</i> <sup>2</sup> <i>(92a)</i> <sup>2</sup> <i>(93a)</i> <sup>2</sup> <i>(94a)</i> <sup>0</sup> <i>(95a)</i> <sup>0</sup> <i>(96a)</i> <sup>0</sup> ... |                                                                                             |            |
|  | 4 <sup>1</sup> A                                                                                                                                                    | 91 <i>a</i> →94 <i>a</i> (62); 90 <i>a</i> →95 <i>a</i> (20); 93 <i>a</i> →94 <i>a</i> (15) | 501(0.089) |
|  | 8 <sup>1</sup> A                                                                                                                                                    | 91 <i>a</i> →95 <i>a</i> (38); 90 <i>a</i> →94 <i>a</i> (24); 93 <i>a</i> →96 <i>a</i> (21) | 377(0.428) |
|  | 9 <sup>1</sup> A                                                                                                                                                    | 90 <i>a</i> →95 <i>a</i> (66); 91 <i>a</i> →94 <i>a</i> (11)                                | 362(0.464) |
|  | 10 <sup>1</sup> A                                                                                                                                                   | 88 <i>a</i> →94 <i>a</i> (48); 89 <i>a</i> →95 <i>a</i> (46)                                | 332(0.075) |
|  | 14 <sup>1</sup> A                                                                                                                                                   | 87 <i>a</i> →94 <i>a</i> (64); 86 <i>a</i> →94 <i>a</i> (23)                                | 311(0.107) |
|  | 21 <sup>1</sup> A                                                                                                                                                   | 93 <i>a</i> →96 <i>a</i> (80); 91 <i>a</i> →96 <i>a</i> (15)                                | 274(0.085) |
|  | 23 <sup>1</sup> A                                                                                                                                                   | 92 <i>a</i> →96 <i>a</i> (91)                                                               | 260(0.085) |
|  | 27 <sup>1</sup> A                                                                                                                                                   | 80 <i>a</i> →94 <i>a</i> (43); 82 <i>a</i> →94 <i>a</i> (26); 91 <i>a</i> →96 <i>a</i> (22) | 252(0.089) |

### Cartesian coordinates (Å):

| Atom | X            | Y            | Z            |
|------|--------------|--------------|--------------|
| P1   | -0.001409003 | -0.119794665 | 0.004306589  |
| N2   | 1.355515755  | -0.167854856 | 1.229070401  |
| N3   | -1.337335520 | 0.219837920  | 1.236117896  |
| N4   | 1.199245008  | -0.142040158 | -1.364512731 |
| N5   | -1.170299733 | 0.249148079  | -1.356572511 |
| N6   | 0.010316202  | 0.019149118  | 3.225483860  |
| N7   | 3.270971477  | -0.456069857 | -0.240564127 |
| N8   | -3.263183656 | 0.436357007  | -0.230962289 |
| C9   | 1.160577760  | -0.146977813 | 2.578405882  |
| C10  | -1.144047143 | 0.176376473  | 2.584790831  |
| C11  | 2.689347951  | -0.376520517 | 0.948078972  |
| C12  | -2.680753434 | 0.360150774  | 0.958411804  |
| C13  | 0.718808092  | -0.042822033 | -2.626510616 |
| C14  | -0.687511253 | 0.171993630  | -2.625388675 |
| C15  | 2.539760018  | -0.338235507 | -1.353776790 |
| C16  | -2.525560703 | 0.365608159  | -1.345611192 |
| C17  | 2.447290846  | -0.352485614 | 3.206118820  |
| C18  | -2.439087474 | 0.314524688  | 3.216315837  |
| C19  | 3.371200148  | -0.492151236 | 2.217783720  |
| C20  | -3.368939382 | 0.423227191  | 2.229842885  |
| C21  | 1.828230180  | -0.192514262 | -3.513636437 |
| C22  | -1.802929149 | 0.274393730  | -3.505814248 |
| C23  | 2.952287035  | -0.374265200 | -2.730966258 |
| C24  | -2.935922126 | 0.397091769  | -2.719845004 |
| H25  | 2.591207078  | -0.384164288 | 4.273355675  |
| H26  | -2.585164157 | 0.317202662  | 4.283842446  |
| H27  | 4.431823764  | -0.660660985 | 2.306968271  |
| H28  | -4.436774380 | 0.537331918  | 2.320891827  |
| H29  | 1.786396156  | -0.161605456 | -4.590366435 |
| H30  | -1.762585854 | 0.254878702  | -4.582923511 |
| H31  | 3.967158365  | -0.520353054 | -3.062903779 |
| H32  | -3.956827621 | 0.492757025  | -3.051752784 |
| O33  | 0.321398173  | 1.619671952  | 0.098714299  |
| O34  | -0.243591074 | -1.630230948 | 0.029185181  |
| H35  | -0.391509137 | 2.100146418  | -0.330796568 |

-----  
TOTAL ENERGY = -1490.0036282760 Hartree  
-----

Frequencies ( $\omega_i$  – cm<sup>-1</sup>) and IR intensities ( $A_i$  – D<sup>2</sup>\*amu/Å<sup>2</sup>)

| $\omega_i$ | $A_i$   | $\omega_i$ | $A_i$   | $\omega_i$ | $A_i$   | $\omega_i$ | $A_i$   |
|------------|---------|------------|---------|------------|---------|------------|---------|
| 67.55      | 0.04894 | 506.78     | 0.00273 | 897.72     | 0.00112 | 1363.44    | 0.10428 |
| 83.90      | 0.00098 | 524.18     | 0.74244 | 900.34     | 0.00484 | 1372.03    | 0.03549 |
| 101.39     | 0.02250 | 555.97     | 0.45770 | 904.82     | 0.08711 | 1406.67    | 0.11604 |
| 119.23     | 0.02250 | 561.44     | 0.71983 | 1010.36    | 1.94447 | 1414.65    | 0.21103 |
| 124.87     | 0.00508 | 568.48     | 0.80901 | 1020.07    | 0.55624 | 1441.48    | 1.99514 |
| 199.00     | 0.25208 | 656.44     | 0.00803 | 1030.02    | 5.37862 | 1464.77    | 0.06998 |
| 219.99     | 0.00239 | 668.48     | 0.00132 | 1035.57    | 0.05182 | 1473.28    | 1.17087 |
| 238.25     | 0.04715 | 680.43     | 0.00854 | 1044.42    | 3.66242 | 1482.57    | 0.09675 |
| 261.24     | 0.13380 | 692.40     | 0.00455 | 1052.51    | 0.17328 | 1503.03    | 1.64252 |
| 281.96     | 0.07251 | 714.40     | 0.04616 | 1060.78    | 3.46075 | 1518.37    | 1.05451 |
| 292.07     | 0.07052 | 719.77     | 1.33737 | 1063.87    | 1.29168 | 1521.86    | 0.82026 |
| 320.13     | 0.20065 | 721.17     | 0.22878 | 1066.63    | 0.22271 | 1536.63    | 0.01656 |
| 344.69     | 0.00970 | 725.58     | 0.58399 | 1082.64    | 0.30801 | 1549.79    | 2.84864 |
| 352.99     | 0.04260 | 735.17     | 0.00531 | 1084.30    | 1.73753 | 1561.95    | 1.44686 |
| 364.56     | 0.01459 | 748.40     | 0.39169 | 1094.45    | 2.65593 | 1568.21    | 0.13028 |
| 369.97     | 0.17065 | 771.96     | 1.07441 | 1097.00    | 1.18775 | 3216.33    | 0.05481 |
| 396.89     | 0.02014 | 782.32     | 0.00836 | 1173.97    | 0.09658 | 3217.21    | 0.18709 |
| 406.44     | 0.04707 | 792.21     | 0.42830 | 1208.43    | 0.01529 | 3222.33    | 0.08013 |
| 424.58     | 0.05725 | 799.05     | 0.04160 | 1230.04    | 0.41120 | 3223.96    | 0.06919 |
| 435.16     | 0.01180 | 803.63     | 0.17215 | 1276.41    | 0.20235 | 3234.99    | 0.59433 |
| 440.19     | 0.01906 | 806.12     | 1.84557 | 1295.51    | 0.74853 | 3235.53    | 0.89788 |
| 463.44     | 0.00741 | 810.28     | 0.09285 | 1298.44    | 1.31891 | 3242.32    | 0.50289 |
| 472.21     | 0.01630 | 812.93     | 0.31182 | 1323.59    | 0.06952 | 3243.73    | 0.49382 |
| 492.56     | 0.09202 | 857.81     | 0.00521 | 1337.00    | 0.11867 | 3824.99    | 0.14965 |
| 501.87     | 0.00872 | 861.39     | 0.01124 | 1358.42    | 0.14381 |            |         |

The electronic absorption spectrum (TDDFT calculation):  $\Delta E$  – excitation energy (eV),  $\lambda$  - wave length (nm),  $f$  – oscillator strength

| State          | $\Delta E$ | $\lambda$ | $f$       | State          | $\Delta E$ | $\lambda$ | $f$       |
|----------------|------------|-----------|-----------|----------------|------------|-----------|-----------|
| <sup>1</sup> A | 1.9832     | 625.17    | 0.0107286 | <sup>1</sup> A | 4.2945     | 288.70    | 0.0004626 |
| <sup>1</sup> A | 2.0337     | 609.65    | 0.0154338 | <sup>1</sup> A | 4.3105     | 287.63    | 0.0005505 |
| <sup>1</sup> A | 2.3803     | 520.88    | 0.0015078 | <sup>1</sup> A | 4.3373     | 285.85    | 0.0081840 |
| <sup>1</sup> A | 2.4748     | 500.98    | 0.0885925 | <sup>1</sup> A | 4.4249     | 280.19    | 0.0263229 |
| <sup>1</sup> A | 2.5960     | 477.60    | 0.0102613 | <sup>1</sup> A | 4.4973     | 275.69    | 0.0583415 |
| <sup>1</sup> A | 2.6984     | 459.46    | 0.0086870 | <sup>1</sup> A | 4.5250     | 274.00    | 0.0848372 |
| <sup>1</sup> A | 3.2005     | 387.39    | 0.0136831 | <sup>1</sup> A | 4.5956     | 269.79    | 0.0000707 |
| <sup>1</sup> A | 3.2848     | 377.45    | 0.4277041 | <sup>1</sup> A | 4.7657     | 260.16    | 0.0851732 |
| <sup>1</sup> A | 3.4239     | 362.11    | 0.4641804 | <sup>1</sup> A | 4.8132     | 257.59    | 0.0027712 |
| <sup>1</sup> A | 3.7336     | 332.08    | 0.0750207 | <sup>1</sup> A | 4.8510     | 255.58    | 0.0012026 |
| <sup>1</sup> A | 3.7754     | 328.40    | 0.0095733 | <sup>1</sup> A | 4.8938     | 253.35    | 0.0202608 |
| <sup>1</sup> A | 3.8560     | 321.53    | 0.0014972 | <sup>1</sup> A | 4.9253     | 251.73    | 0.0885692 |
| <sup>1</sup> A | 3.9511     | 313.80    | 0.0181680 | <sup>1</sup> A | 5.0317     | 246.41    | 0.0001495 |
| <sup>1</sup> A | 3.9846     | 311.16    | 0.1071032 | <sup>1</sup> A | 5.0955     | 243.32    | 0.0105531 |
| <sup>1</sup> A | 4.0675     | 304.82    | 0.0008902 | <sup>1</sup> A | 5.1887     | 238.95    | 0.0000713 |

### 3. Dinion [CAP(O-)<sub>2</sub>]

|  |                                |                                                                                  |            |
|--|--------------------------------|----------------------------------------------------------------------------------|------------|
|  | State                          | Composition **)                                                                  | $\lambda$  |
|  | 9 <sup>1</sup> A <sub>1</sub>  | 6a <sub>2</sub> →8a <sub>2</sub> (70); 11b <sub>1</sub> →13b <sub>1</sub> (28)   | 509(0.067) |
|  | 10 <sup>1</sup> B <sub>2</sub> | 11b <sub>1</sub> →8a <sub>2</sub> (80); 6a <sub>2</sub> →13b <sub>1</sub> (15)   | 501(0.027) |
|  | 11 <sup>1</sup> B <sub>2</sub> | 6a <sub>2</sub> →13b <sub>1</sub> (77); 11b <sub>1</sub> →8a <sub>2</sub> (13)   | 390(0.388) |
|  | 12 <sup>1</sup> A <sub>1</sub> | 11b <sub>1</sub> →13b <sub>1</sub> (66); 6a <sub>2</sub> →8a <sub>2</sub> (23)   | 389(0.417) |
|  | 14 <sup>1</sup> A <sub>1</sub> | 5a <sub>2</sub> →8a <sub>2</sub> (95)                                            | 333(0.064) |
|  | 16 <sup>1</sup> B <sub>2</sub> | 10b <sub>1</sub> →8a <sub>2</sub> (96)                                           | 320(0.042) |
|  | 25 <sup>1</sup> B <sub>2</sub> | 7a <sub>2</sub> →14b <sub>1</sub> (90)                                           | 292(0.103) |
|  | 26 <sup>1</sup> A <sub>1</sub> | 10b <sub>1</sub> →13b <sub>1</sub> (84); 4a <sub>2</sub> →8a <sub>2</sub> (10)   | 288(0.044) |
|  | 30 <sup>1</sup> A <sub>1</sub> | 33b <sub>2</sub> →34b <sub>2</sub> (85); 12b <sub>1</sub> →14b <sub>1</sub> (10) | 281(0.042) |

#### Cartesian coordinates (Å):

| Atom | X            | Y            | Z            |
|------|--------------|--------------|--------------|
| P1   | 0.000000000  | 0.000000000  | 0.015116288  |
| N2   | 0.000000000  | -1.394480206 | -1.238747660 |
| N3   | 0.000000000  | 1.394480206  | -1.238747660 |
| N4   | 0.000000000  | -1.211186971 | 1.405771152  |
| N5   | 0.000000000  | 1.211186971  | 1.405771152  |
| N6   | 0.000000000  | 0.000000000  | -3.213184142 |
| N7   | 0.000000000  | -3.307065536 | 0.251770831  |
| N8   | 0.000000000  | 3.307065536  | 0.251770831  |
| C9   | 0.000000000  | -1.177390512 | -2.574201547 |
| C10  | 0.000000000  | 1.177390512  | -2.574201547 |
| C11  | 0.000000000  | -2.730582949 | -0.950161410 |
| C12  | 0.000000000  | 2.730582949  | -0.950161410 |
| C13  | 0.000000000  | -0.721040257 | 2.661150035  |
| C14  | 0.000000000  | 0.721040257  | 2.661150035  |
| C15  | 0.000000000  | -2.566029273 | 1.376354206  |
| C16  | 0.000000000  | 2.566029273  | 1.376354206  |
| C17  | 0.000000000  | -2.487993295 | -3.215096205 |
| C18  | 0.000000000  | 2.487993295  | -3.215096205 |
| C19  | 0.000000000  | -3.428648441 | -2.228639395 |
| C20  | 0.000000000  | 3.428648441  | -2.228639395 |
| C21  | 0.000000000  | -1.846594177 | 3.544380879  |
| C22  | 0.000000000  | 1.846594177  | 3.544380879  |
| C23  | 0.000000000  | -2.989596800 | 2.754516940  |
| C24  | 0.000000000  | 2.989596800  | 2.754516940  |
| H25  | 0.000000000  | -2.638964791 | -4.284269013 |
| H26  | 0.000000000  | 2.638964791  | -4.284269013 |
| H27  | 0.000000000  | -4.503853480 | -2.328956151 |
| H28  | 0.000000000  | 4.503853480  | -2.328956151 |
| H29  | 0.000000000  | -1.809561911 | 4.624294087  |
| H30  | 0.000000000  | 1.809561911  | 4.624294087  |
| H31  | 0.000000000  | -4.016430429 | 3.088794063  |
| H32  | 0.000000000  | 4.016430429  | 3.088794063  |
| O33  | -1.568608754 | 0.000000000  | -0.050406546 |
| O34  | 1.568608754  | 0.000000000  | -0.050406546 |

TOTAL ENERGY = -1489.2961306327 Hartree

-----  
 Frequencies ( $\omega_i$  –  $\text{cm}^{-1}$ ) and IR intensities ( $A_i$  –  $\text{D}^2 \cdot \text{amu}/\text{\AA}^2$ )

| $\omega_i$ | $A_i$   | $\omega_i$ | $A_i$   | $\omega_i$ | $A_i$   | $\omega_i$ | $A_i$   |
|------------|---------|------------|---------|------------|---------|------------|---------|
| 49.03      | 0.08543 | 509.38     | 0.00024 | 840.93     | 0.00000 | 1377.90    | 0.03470 |
| 84.65      | 0.00000 | 546.93     | 0.49418 | 900.38     | 0.14776 | 1408.32    | 0.08930 |
| 108.02     | 0.00000 | 561.23     | 0.73311 | 998.89     | 0.45914 | 1418.10    | 1.95124 |
| 114.63     | 0.02330 | 641.11     | 0.05181 | 999.10     | 1.02170 | 1439.42    | 2.58696 |
| 123.57     | 0.00038 | 646.45     | 0.00000 | 1010.43    | 6.08927 | 1444.78    | 0.30602 |
| 231.47     | 0.00000 | 666.29     | 0.30931 | 1020.93    | 0.10097 | 1467.42    | 0.15966 |
| 234.15     | 0.04519 | 674.00     | 0.00000 | 1027.78    | 5.32180 | 1474.91    | 1.68920 |
| 249.14     | 0.04080 | 685.65     | 0.00000 | 1033.22    | 2.56331 | 1491.53    | 1.44150 |
| 268.57     | 0.02824 | 691.11     | 2.42401 | 1035.82    | 0.15740 | 1493.65    | 1.49679 |
| 275.98     | 0.02015 | 697.03     | 0.00000 | 1045.96    | 0.13786 | 1500.33    | 0.23071 |
| 304.58     | 0.17487 | 714.12     | 0.04460 | 1049.84    | 0.68125 | 1527.63    | 3.95926 |
| 328.09     | 0.00000 | 719.82     | 0.76634 | 1065.54    | 0.65169 | 1532.14    | 0.68601 |
| 347.60     | 0.05271 | 742.07     | 0.46099 | 1075.00    | 2.38392 | 1544.56    | 1.82890 |
| 349.38     | 0.00002 | 752.53     | 0.23396 | 1078.18    | 0.73021 | 3178.13    | 0.10171 |
| 365.82     | 0.00000 | 754.09     | 0.00000 | 1158.85    | 0.13352 | 3179.61    | 1.05544 |
| 387.07     | 0.00348 | 773.21     | 0.00000 | 1200.79    | 0.00773 | 3186.35    | 0.38993 |
| 396.21     | 0.02689 | 780.12     | 0.25946 | 1239.80    | 0.65123 | 3186.71    | 0.23408 |
| 423.19     | 0.07023 | 780.63     | 0.00000 | 1265.89    | 0.06676 | 3202.53    | 2.03265 |
| 428.03     | 0.00801 | 784.68     | 0.48101 | 1287.11    | 0.78104 | 3203.43    | 3.04330 |
| 438.12     | 0.00000 | 786.63     | 0.91487 | 1288.98    | 2.49235 | 3209.52    | 2.30810 |
| 442.14     | 0.41303 | 791.38     | 0.69382 | 1316.57    | 0.14965 | 3210.18    | 1.73055 |
| 443.60     | 0.14526 | 803.98     | 0.10725 | 1338.53    | 0.95741 | 3241.87    | 0.49016 |
| 463.93     | 0.45761 | 806.46     | 0.18014 | 1348.99    | 0.13306 | 3242.60    | 0.50222 |
| 502.79     | 0.00000 | 810.11     | 0.21023 | 1354.30    | 0.05041 | 3843.23    | 0.18693 |
| 504.59     | 0.78653 | 839.27     | 0.00000 | 1358.39    | 0.44971 |            |         |
|            |         |            |         |            |         |            |         |

The electronic absorption spectrum (TDDFT calculation):  $\Delta E$  – excitation energy (eV),  $\lambda$  - wave length (nm),  $f$  – oscillator strength

| State   | $\Delta E$ | $\lambda$ | $f$       | State   | $\Delta E$ | $\lambda$ | $f$       |
|---------|------------|-----------|-----------|---------|------------|-----------|-----------|
| $^1A_2$ | 1.1119     | 1115.03   | 0.0000000 | $^1B_2$ | 3.8721     | 320.20    | 0.0415318 |
| $^1B_1$ | 1.2535     | 989.10    | 0.0014702 | $^1A_2$ | 3.8765     | 319.84    | 0.0000000 |
| $^1A_2$ | 1.5623     | 793.60    | 0.0000000 | $^1B_1$ | 3.9090     | 317.17    | 0.0005386 |
| $^1B_2$ | 1.6207     | 764.99    | 0.0038926 | $^1B_1$ | 3.9497     | 313.91    | 0.0047865 |
| $^1A_1$ | 1.6514     | 750.80    | 0.0155144 | $^1B_2$ | 4.0167     | 308.67    | 0.0032645 |
| $^1B_1$ | 1.8338     | 676.09    | 0.0059916 | $^1A_1$ | 4.0630     | 305.15    | 0.0086739 |
| $^1B_2$ | 1.9496     | 635.94    | 0.0000449 | $^1B_1$ | 4.0684     | 304.75    | 0.0007448 |
| $^1A_1$ | 2.2954     | 540.13    | 0.0025540 | $^1B_2$ | 4.2063     | 294.76    | 0.0007137 |
| $^1A_1$ | 2.4344     | 509.29    | 0.0674682 | $^1A_2$ | 4.2205     | 293.77    | 0.0000000 |
| $^1B_2$ | 2.4736     | 501.24    | 0.0269982 | $^1B_2$ | 4.2423     | 292.25    | 0.1028789 |
| $^1B_2$ | 3.1829     | 389.53    | 0.3878363 | $^1A_1$ | 4.2977     | 288.49    | 0.0439717 |
| $^1A_1$ | 3.1913     | 388.51    | 0.4165013 | $^1B_1$ | 4.2978     | 288.48    | 0.0000613 |
| $^1A_2$ | 3.4211     | 362.41    | 0.0000000 | $^1B_2$ | 4.3402     | 285.67    | 0.0145182 |
| $^1A_1$ | 3.7181     | 333.46    | 0.0644630 | $^1A_1$ | 4.3982     | 281.90    | 0.0181687 |
| $^1A_2$ | 3.8334     | 323.43    | 0.0000000 | $^1A_1$ | 4.4146     | 280.85    | 0.0421009 |



#### 4. Cation $[PAP(OH)_2]^+$

| 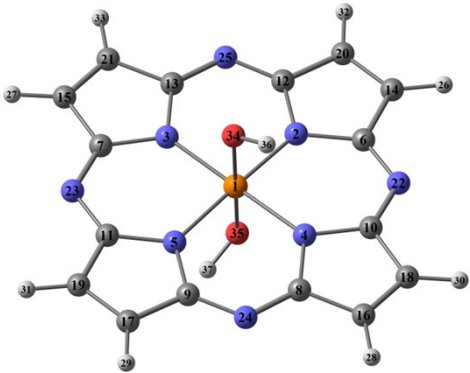 | State                    | Composition **)                                                                                                                                                                   | $\lambda$  |
|-----------------------------------------------------------------------------------|--------------------------|-----------------------------------------------------------------------------------------------------------------------------------------------------------------------------------|------------|
|                                                                                   |                          | $\dots(4a_2)^2(32b_2)^2(9b_1)^2(39a_1)^2(10b_1)^2(5a_2)^2(40a_1)^2(11b_1)^2(6a_2)^2(12b_1)^2(7a_2)^2(41a_1)^2(33b_2)^2(8a_2)^0(13b_1)^0(42a_1)^0(14b_1)^0(43a_1)^0(34b_2)^0\dots$ |            |
|                                                                                   | 1 <sup>1</sup> A         | 50a→51a(83); 46b→47b(15)                                                                                                                                                          | 503(0.135) |
|                                                                                   | 2 <sup>1</sup> B         | 50a→47b(83); 46b→51a(15)                                                                                                                                                          | 503(0.134) |
|                                                                                   | 17 <sup>1</sup> B        | 46b→51a(76); 50a→47b(16)                                                                                                                                                          | 313(0.757) |
| 18 <sup>1</sup> A                                                                 | 46b→47b(77); 50a→51a(16) | 313(0.756)                                                                                                                                                                        |            |

#### Cartesian coordinates (Å):

| Atom | X            | Y            | Z            |
|------|--------------|--------------|--------------|
| P1   | 0.000000000  | 0.000000000  | 0.013887590  |
| N2   | -1.302710523 | 0.257478467  | 1.322320077  |
| N3   | 1.302710523  | -0.257478467 | 1.322320077  |
| N4   | -1.291967890 | 0.323950711  | -1.333691237 |
| N5   | 1.291967890  | -0.323950711 | -1.333691237 |
| C6   | -2.649292474 | 0.515708796  | 1.133355741  |
| C7   | 2.649292474  | -0.515708796 | 1.133355741  |
| C8   | -1.113696949 | 0.252329424  | -2.708608699 |
| C9   | 1.113696949  | -0.252329424 | -2.708608699 |
| C10  | -2.647733796 | 0.546574692  | -1.147502928 |
| C11  | 2.647733796  | -0.546574692 | -1.147502928 |
| C12  | -1.117706914 | 0.222431511  | 2.692378208  |
| C13  | 1.117706914  | -0.222431511 | 2.692378208  |
| C14  | -3.305608677 | 0.643495093  | 2.407989147  |
| C15  | 3.305608677  | -0.643495093 | 2.407989147  |
| C16  | -2.366048985 | 0.477944982  | -3.375385456 |
| C17  | 2.366048985  | -0.477944982 | -3.375385456 |
| C18  | -3.305671200 | 0.654182172  | -2.419929039 |
| C19  | 3.305671200  | -0.654182172 | -2.419929039 |
| C20  | -2.367738417 | 0.467995660  | 3.361930297  |
| C21  | 2.367738417  | -0.467995660 | 3.361930297  |
| N22  | -3.283983286 | 0.648232151  | -0.005150722 |
| N23  | 3.283983286  | -0.648232151 | -0.005150722 |
| N24  | 0.000000000  | 0.000000000  | -3.352926002 |
| N25  | 0.000000000  | 0.000000000  | 3.339185256  |
| H26  | -4.358158039 | 0.847461225  | 2.505236744  |
| H27  | 4.358158039  | -0.847461225 | 2.505236744  |
| H28  | -2.465991184 | 0.481570763  | -4.447361326 |
| H29  | 2.465991184  | -0.481570763 | -4.447361326 |
| H30  | -4.361751762 | 0.838646588  | -2.519631785 |
| H31  | 4.361751762  | -0.838646588 | -2.519631785 |
| H32  | -2.462112277 | 0.491039334  | 4.434072638  |
| H33  | 2.462112277  | -0.491039334 | 4.434072638  |
| O34  | 0.426794743  | 1.601877789  | 0.057206235  |
| O35  | -0.426794743 | -1.601877789 | 0.057206235  |
| H36  | -0.101680496 | 2.159536715  | -0.524451543 |
| H37  | 0.101680496  | -2.159536715 | -0.524451543 |

TOTAL ENERGY = -1545.0643754173 Hartree

-----  
 Frequencies ( $\omega_i$  –  $\text{cm}^{-1}$ ) and IR intensities ( $A_i$  –  $\text{D}^2 \cdot \text{amu}/\text{\AA}^2$ )

| $\omega_i$ | $A_i$   | $\omega_i$ | $A_i$   | $\omega_i$ | $A_i$   | $\omega_i$ | $A_i$   |
|------------|---------|------------|---------|------------|---------|------------|---------|
| 13.68      | 0.00660 | 485.45     | 0.00057 | 973.67     | 0.00033 | 1375.32    | 0.00143 |
| 54.07      | 0.00221 | 498.78     | 1.33922 | 974.02     | 0.00000 | 1421.28    | 0.00175 |
| 109.61     | 0.07631 | 500.07     | 1.21640 | 974.91     | 0.00002 | 1498.09    | 0.02128 |
| 140.71     | 0.00357 | 501.96     | 0.00601 | 1009.63    | 0.00992 | 1499.02    | 0.01853 |
| 140.77     | 0.01038 | 654.63     | 0.00264 | 1016.36    | 4.85042 | 1523.51    | 0.00105 |
| 165.20     | 0.01395 | 669.60     | 0.00223 | 1017.55    | 4.68171 | 1544.03    | 0.00015 |
| 165.84     | 0.00849 | 687.16     | 0.01018 | 1026.65    | 0.03066 | 1550.36    | 0.28418 |
| 233.11     | 0.40263 | 687.63     | 0.00427 | 1039.65    | 0.26444 | 1558.70    | 0.77293 |
| 249.71     | 0.21087 | 706.49     | 0.00222 | 1042.94    | 0.36323 | 1558.80    | 1.11294 |
| 260.27     | 0.31495 | 707.73     | 0.00000 | 1044.02    | 0.58395 | 1573.23    | 0.09912 |
| 275.71     | 0.02332 | 737.19     | 0.35885 | 1056.45    | 0.10991 | 1595.67    | 0.29601 |
| 279.97     | 0.14060 | 745.45     | 0.25971 | 1061.97    | 3.18551 | 1596.39    | 0.28781 |
| 287.61     | 0.07614 | 745.72     | 0.18191 | 1077.98    | 0.01326 | 1606.27    | 0.02538 |
| 292.01     | 0.23518 | 748.02     | 0.36687 | 1090.23    | 1.81999 | 1642.85    | 0.02328 |
| 313.17     | 0.45799 | 748.07     | 0.34091 | 1090.34    | 1.99587 | 3251.36    | 0.05043 |
| 343.89     | 0.00420 | 752.64     | 0.00213 | 1093.14    | 0.29696 | 3251.55    | 0.08664 |
| 354.00     | 0.00336 | 763.92     | 0.00946 | 1093.83    | 0.40598 | 3252.74    | 0.12094 |
| 354.46     | 0.08711 | 802.93     | 0.03081 | 1187.00    | 0.03413 | 3252.87    | 0.11762 |
| 393.07     | 0.01888 | 803.42     | 0.02874 | 1187.75    | 0.03527 | 3266.87    | 0.29105 |
| 396.16     | 0.06770 | 808.52     | 0.00158 | 1191.84    | 0.00634 | 3266.91    | 0.26481 |
| 398.57     | 0.00006 | 809.81     | 0.00000 | 1213.72    | 0.00041 | 3268.49    | 0.19563 |
| 438.75     | 0.01726 | 846.74     | 0.01118 | 1301.45    | 0.07807 | 3268.52    | 0.22895 |
| 439.13     | 0.00159 | 849.43     | 0.27465 | 1303.13    | 0.05634 | 3811.18    | 0.23901 |
| 461.40     | 0.00110 | 849.48     | 0.00003 | 1324.39    | 0.00149 | 3811.37    | 2.21576 |
| 462.95     | 0.27323 | 850.99     | 1.73293 | 1330.26    | 0.00028 |            |         |
| 470.62     | 0.00309 | 884.16     | 9.27286 | 1359.61    | 0.47723 |            |         |
| 473.91     | 0.02678 | 972.85     | 0.00028 | 1360.40    | 0.49912 |            |         |

The electronic absorption spectrum (TDDFT calculation):  $\Delta E$  – excitation energy (eV),  $\lambda$  - wave length (nm),  $f$  – oscillator strength

| State          | $\Delta E$ | $\lambda$ | $f$       | State          | $\Delta E$ | $\lambda$ | $f$       |
|----------------|------------|-----------|-----------|----------------|------------|-----------|-----------|
| <sup>1</sup> A | 2.4640     | 503.18    | 0.1352778 | <sup>1</sup> A | 3.8222     | 324.38    | 0.0032042 |
| <sup>1</sup> B | 2.4655     | 502.87    | 0.1339845 | <sup>1</sup> B | 3.9621     | 312.93    | 0.7569650 |
| <sup>1</sup> B | 3.2468     | 381.87    | 0.0000397 | <sup>1</sup> A | 3.9622     | 312.92    | 0.7564006 |
| <sup>1</sup> A | 3.2567     | 380.71    | 0.0000263 | <sup>1</sup> B | 4.2145     | 294.18    | 0.0000774 |
| <sup>1</sup> B | 3.3935     | 365.36    | 0.0006653 | <sup>1</sup> A | 4.5016     | 275.42    | 0.0009070 |
| <sup>1</sup> A | 3.4683     | 357.48    | 0.0006906 | <sup>1</sup> B | 4.5073     | 275.07    | 0.0010407 |
| <sup>1</sup> B | 3.4768     | 356.60    | 0.0003992 | <sup>1</sup> B | 4.7989     | 258.36    | 0.0006425 |
| <sup>1</sup> A | 3.4842     | 355.85    | 0.0012972 | <sup>1</sup> A | 4.8046     | 258.05    | 0.0000039 |
| <sup>1</sup> B | 3.5442     | 349.82    | 0.0058864 | <sup>1</sup> A | 4.9058     | 252.73    | 0.0013363 |
| <sup>1</sup> A | 3.5517     | 349.08    | 0.0048219 | <sup>1</sup> B | 4.9583     | 250.05    | 0.0047760 |
| <sup>1</sup> B | 3.7739     | 328.53    | 0.0017313 | <sup>1</sup> B | 5.1463     | 240.92    | 0.0003522 |
| <sup>1</sup> A | 3.7850     | 327.56    | 0.0014183 | <sup>1</sup> A | 5.2955     | 234.13    | 0.0017756 |
| <sup>1</sup> B | 3.7868     | 327.41    | 0.0038340 | <sup>1</sup> A | 5.3076     | 233.60    | 0.0298025 |
| <sup>1</sup> B | 3.7934     | 326.84    | 0.0076493 | <sup>1</sup> A | 5.3164     | 233.21    | 0.0035445 |
| <sup>1</sup> A | 3.8162     | 324.89    | 0.0015930 | <sup>1</sup> B | 5.3337     | 232.45    | 0.0327787 |

## 5. Porphyrazine [PAP(=O)(OH)]

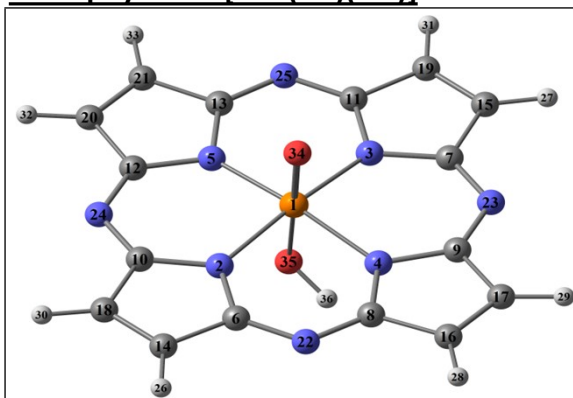

| State               | Composition **)                                                                                                                   | $\lambda$  |
|---------------------|-----------------------------------------------------------------------------------------------------------------------------------|------------|
|                     | $\dots(53a'')^2(54a'')^2(36a'')^2(55a'')^2(37a'')^2(56a'')^2(57a'')^2(38a'')^2(39a'')^2(58a'')^0(40a'')^0(41a'')^0(59a'')^0\dots$ |            |
| 4 <sup>1</sup> A'   | 39a''→40a''(82); 56a'→58a'(16)                                                                                                    | 497(0.150) |
| 5 <sup>1</sup> A''  | 39a''→58a'(83); 56a'→40a''(15)                                                                                                    | 495(0.155) |
| 9 <sup>1</sup> A'   | 56a'→58a'(41); 55a'→58a'(36); 54a'→58a'(11)                                                                                       | 358(0.092) |
| 12 <sup>1</sup> A'' | 55a'→40a''(28); 56a'→40a''(25); 54a'→40a''(21); 36a''→58a'(17)                                                                    | 349(0.082) |
| 19 <sup>1</sup> A'  | 38a''→41a''(54); 54a'→58a'(35)                                                                                                    | 310(0.084) |
| 21 <sup>1</sup> A'' | 54a'→40a''(46); 57a'→41a''(34); 56a'→40a''(10)                                                                                    | 308(0.173) |
| 24 <sup>1</sup> A'  | 38a''→41a''(40); 54a'→58a'(26); 56a'→58a'(20)                                                                                     | 300(0.490) |
| 25 <sup>1</sup> A'' | 57a'→41a''(61); 56a'→40a''(16); 54a'→40a''(14)                                                                                    | 298(0.400) |

Cartesian coordinates (Å):

| Atom | X            | Y            | Z            |
|------|--------------|--------------|--------------|
| P1   | -0.020126825 | 0.069133058  | 0.000000000  |
| N2   | 0.000906918  | -0.048414833 | 1.920495241  |
| N3   | 0.000906918  | -0.048414833 | -1.920495241 |
| N4   | 1.914671128  | -0.117484230 | 0.000000000  |
| N5   | -1.900866823 | -0.043025752 | 0.000000000  |
| C6   | 1.103649785  | -0.017740971 | 2.732522608  |
| C7   | 1.103649785  | -0.017740971 | -2.732522608 |
| C8   | 2.731507893  | -0.042272078 | 1.103441424  |
| C9   | 2.731507893  | -0.042272078 | -1.103441424 |
| C10  | -1.096712089 | -0.016763141 | 2.736295680  |
| C11  | -1.096712089 | -0.016763141 | -2.736295680 |
| C12  | -2.716403374 | -0.017600193 | 1.103457576  |
| C13  | -2.716403374 | -0.017600193 | -1.103457576 |
| C14  | 0.679337097  | 0.025109199  | 4.117673358  |
| C15  | 0.679337097  | 0.025109199  | -4.117673358 |
| C16  | 4.109462561  | 0.035769999  | 0.675613045  |
| C17  | 4.109462561  | 0.035769999  | -0.675613045 |
| C18  | -0.669523549 | 0.024277995  | 4.120204083  |
| C19  | -0.669523549 | 0.024277995  | -4.120204083 |
| C20  | -4.097510109 | 0.015134606  | 0.674593405  |
| C21  | -4.097510109 | 0.015134606  | -0.674593405 |
| N22  | 2.370409754  | -0.022472869 | 2.370749755  |
| N23  | 2.370409754  | -0.022472869 | -2.370749755 |
| N24  | -2.362641821 | -0.014035763 | 2.371857582  |
| N25  | -2.362641821 | -0.014035763 | -2.371857582 |
| H26  | 1.367732975  | 0.053690274  | 4.944865233  |
| H27  | 1.367732975  | 0.053690274  | -4.944865233 |
| H28  | 4.937598885  | 0.093915313  | 1.361017992  |
| H29  | 4.937598885  | 0.093915313  | -1.361017992 |
| H30  | -1.354864190 | 0.053374673  | 4.949880776  |
| H31  | -1.354864190 | 0.053374673  | -4.949880776 |
| H32  | -4.925629145 | 0.039019886  | 1.361834732  |
| H33  | -4.925629145 | 0.039019886  | -1.361834732 |
| O34  | 0.036372784  | 1.581329450  | 0.000000000  |
| O35  | -0.113043158 | -1.627493931 | 0.000000000  |
| H36  | 0.767545790  | -2.015034238 | 0.000000000  |

TOTAL ENERGY = -1544.6565990413 Hartree

-----  
 Frequencies ( $\omega_i - \text{cm}^{-1}$ ) and IR intensities ( $A_i - \text{D}^2 \cdot \text{amu}/\text{\AA}^2$ )

| $\omega_i$ | $A_i$   | $\omega_i$ | $A_i$   | $\omega_i$ | $A_i$   | $\omega_i$ | $A_i$   |
|------------|---------|------------|---------|------------|---------|------------|---------|
| 55.02      | 0.00488 | 483.14     | 1.43827 | 946.48     | 0.00117 | 1361.00    | 0.00017 |
| 59.25      | 0.00001 | 486.69     | 1.50975 | 948.33     | 0.00025 | 1362.68    | 0.24870 |
| 99.47      | 0.10519 | 494.73     | 0.04426 | 948.85     | 0.00001 | 1364.42    | 0.28961 |
| 133.11     | 0.00730 | 496.95     | 0.00166 | 1005.67    | 4.66315 | 1418.91    | 0.13533 |
| 134.55     | 0.02162 | 653.24     | 0.64709 | 1006.73    | 4.59634 | 1487.79    | 0.10265 |
| 179.89     | 0.00149 | 674.07     | 0.02204 | 1014.59    | 0.02592 | 1494.69    | 0.05383 |
| 181.39     | 0.00448 | 690.41     | 0.04074 | 1017.74    | 0.21854 | 1507.96    | 0.00669 |
| 216.20     | 0.18192 | 690.80     | 0.00446 | 1025.24    | 0.37757 | 1523.02    | 0.00294 |
| 236.88     | 0.00530 | 709.61     | 0.00040 | 1042.89    | 0.00016 | 1537.97    | 0.16477 |
| 267.96     | 0.00922 | 709.94     | 0.01343 | 1044.47    | 0.03541 | 1546.31    | 1.27918 |
| 269.13     | 0.05512 | 735.10     | 0.81974 | 1075.77    | 0.06782 | 1549.21    | 0.21571 |
| 269.26     | 0.09598 | 745.91     | 0.03485 | 1076.77    | 1.80440 | 1552.70    | 1.28909 |
| 301.92     | 0.00078 | 746.50     | 0.12551 | 1081.37    | 1.18220 | 1586.43    | 1.07925 |
| 315.47     | 0.07241 | 748.19     | 0.73062 | 1081.41    | 2.06422 | 1589.54    | 1.21025 |
| 320.97     | 0.37410 | 751.51     | 0.85003 | 1082.39    | 1.25277 | 1599.69    | 0.03806 |
| 321.97     | 0.37810 | 754.36     | 0.00906 | 1085.74    | 1.70372 | 1617.36    | 0.00536 |
| 343.86     | 0.00842 | 763.71     | 0.00347 | 1130.77    | 1.59312 | 3243.67    | 0.00052 |
| 372.86     | 0.01330 | 800.90     | 0.22312 | 1190.03    | 0.03149 | 3243.91    | 0.00217 |
| 403.13     | 0.02379 | 803.16     | 0.16677 | 1192.38    | 0.02466 | 3244.17    | 0.00712 |
| 404.87     | 0.00049 | 806.35     | 0.01219 | 1206.83    | 0.00042 | 3245.71    | 0.00431 |
| 420.88     | 0.21469 | 816.24     | 0.00016 | 1214.14    | 0.00027 | 3261.45    | 0.00911 |
| 424.62     | 0.13582 | 826.06     | 0.00690 | 1298.95    | 0.39419 | 3261.84    | 0.02016 |
| 446.24     | 0.01008 | 831.09     | 0.00109 | 1303.94    | 0.36755 | 3262.08    | 0.00001 |
| 452.30     | 0.00086 | 831.83     | 0.04056 | 1335.46    | 0.00105 | 3263.50    | 0.00552 |
| 479.56     | 0.01794 | 837.99     | 3.87184 | 1340.85    | 0.01298 | 3827.83    | 0.55913 |
| 480.32     | 0.01954 | 946.12     | 0.00000 |            |         |            |         |

The electronic absorption spectrum (TDDFT calculation):  $\Delta E$  – excitation energy (eV),  $\lambda$  - wave length (nm),  $f$  – oscillator strength

| State            | $\Delta E$ | $\lambda$ | $f$       | State            | $\Delta E$ | $\lambda$ | $f$       |
|------------------|------------|-----------|-----------|------------------|------------|-----------|-----------|
| <sup>1</sup> A'' | 2.1541     | 575.56    | 0.0000087 | <sup>1</sup> A'  | 3.8240     | 324.23    | 0.0033791 |
| <sup>1</sup> A'' | 2.2301     | 555.96    | 0.0000033 | <sup>1</sup> A'' | 3.9356     | 315.03    | 0.0038712 |
| <sup>1</sup> A'  | 2.2494     | 551.19    | 0.0000562 | <sup>1</sup> A'  | 3.9555     | 313.45    | 0.0001123 |
| <sup>1</sup> A'  | 2.4963     | 496.68    | 0.1503304 | <sup>1</sup> A'  | 3.9944     | 310.39    | 0.0837578 |
| <sup>1</sup> A'' | 2.5043     | 495.08    | 0.1553198 | <sup>1</sup> A'' | 3.9956     | 310.30    | 0.0048147 |
| <sup>1</sup> A'  | 2.6718     | 464.04    | 0.0058752 | <sup>1</sup> A'' | 4.0204     | 308.39    | 0.1732007 |
| <sup>1</sup> A'' | 3.2759     | 378.47    | 0.0000018 | <sup>1</sup> A'  | 4.0245     | 308.07    | 0.0013928 |
| <sup>1</sup> A'  | 3.4221     | 362.31    | 0.0023060 | <sup>1</sup> A'  | 4.0892     | 303.20    | 0.0065186 |
| <sup>1</sup> A'  | 3.4648     | 357.84    | 0.0917941 | <sup>1</sup> A'  | 4.1282     | 300.34    | 0.4904777 |
| <sup>1</sup> A'' | 3.5297     | 351.26    | 0.0158092 | <sup>1</sup> A'' | 4.1544     | 298.44    | 0.4002973 |
| <sup>1</sup> A'  | 3.5341     | 350.83    | 0.0002237 | <sup>1</sup> A'  | 4.4813     | 276.67    | 0.0010200 |
| <sup>1</sup> A'' | 3.5476     | 349.48    | 0.0819127 | <sup>1</sup> A'' | 4.4828     | 276.58    | 0.0044398 |
| <sup>1</sup> A'' | 3.6858     | 336.38    | 0.0336791 | <sup>1</sup> A'' | 4.8406     | 256.13    | 0.0000012 |
| <sup>1</sup> A'' | 3.7436     | 331.19    | 0.0002482 | <sup>1</sup> A'' | 4.8742     | 254.37    | 0.0012547 |
| <sup>1</sup> A'  | 3.7496     | 330.66    | 0.0373690 | <sup>1</sup> A'  | 4.8752     | 254.31    | 0.0015215 |

## 6. Porphyrazine anion [PAP(O)(O-)]

|                                |                                        |                                                                                                                                                                   |            |
|--------------------------------|----------------------------------------|-------------------------------------------------------------------------------------------------------------------------------------------------------------------|------------|
|                                | State                                  | Composition **)                                                                                                                                                   | $\lambda$  |
|                                |                                        | $\dots(18e_u)^4(16a_{1g})^2(6a_{2u})^2(8b_{2g})^2(2b_{2u})^2(7a_{2u})^2(4e_g)^4(1a_{1u})^2(19e_u)^4(5e_g)^0(2b_{1u})^0(3b_{2u})^0(17a_{1g})^0(6e_g)^0\dots$       |            |
|                                | 8 <sup>1</sup> E <sub>u</sub>          | 1a <sub>1u</sub> →5e <sub>g</sub> (77); 7a <sub>2u</sub> →5e <sub>g</sub> (19)                                                                                    | 494(0.280) |
|                                | 11 <sup>1</sup> E <sub>u</sub>         | 7a <sub>2u</sub> →5e <sub>g</sub> (52); 4e <sub>g</sub> →2b <sub>1u</sub> (18); 1a <sub>1u</sub> →5e <sub>g</sub> (11);<br>2b <sub>2u</sub> →5e <sub>g</sub> (11) | 374(0.244) |
|                                | 13 <sup>1</sup> E <sub>u</sub>         | 4e <sub>g</sub> →2b <sub>1u</sub> (65); 2b <sub>2u</sub> →5e <sub>g</sub> (24)                                                                                    | 333(0.138) |
|                                | 14 <sup>1</sup> E <sub>u</sub>         | 2b <sub>2u</sub> →5e <sub>g</sub> (61); 7a <sub>2u</sub> →5e <sub>g</sub> (15); 4e <sub>g</sub> →2b <sub>1u</sub> (11)                                            | 330(0.220) |
| 21 <sup>1</sup> E <sub>u</sub> | 6a <sub>2u</sub> →5e <sub>g</sub> (74) | 293(0.822)                                                                                                                                                        |            |

Cartesian coordinates (Å):

| Atom | X            | Y            | Z           |
|------|--------------|--------------|-------------|
| P1   | 0.000000000  | 0.000000000  | 0.000000000 |
| N2   | -1.952326463 | 0.000000000  | 0.000000000 |
| N3   | 0.000000000  | -1.952326463 | 0.000000000 |
| N4   | 1.952326463  | 0.000000000  | 0.000000000 |
| N5   | 0.000000000  | 1.952326463  | 0.000000000 |
| C6   | 2.747640173  | 1.103297665  | 0.000000000 |
| C7   | -1.103297665 | 2.747640173  | 0.000000000 |
| C8   | -2.747640173 | -1.103297665 | 0.000000000 |
| C9   | 1.103297665  | 2.747640173  | 0.000000000 |
| C10  | -2.747640173 | 1.103297665  | 0.000000000 |
| C11  | -1.103297665 | -2.747640173 | 0.000000000 |
| C12  | 2.747640173  | -1.103297665 | 0.000000000 |
| C13  | 1.103297665  | -2.747640173 | 0.000000000 |
| C14  | 4.140528278  | 0.675643897  | 0.000000000 |
| C15  | -0.675643897 | 4.140528278  | 0.000000000 |
| C16  | -4.140528278 | -0.675643897 | 0.000000000 |
| C17  | 0.675643897  | 4.140528278  | 0.000000000 |
| C18  | -4.140528278 | 0.675643897  | 0.000000000 |
| C19  | -0.675643897 | -4.140528278 | 0.000000000 |
| C20  | 4.140528278  | -0.675643897 | 0.000000000 |
| C21  | 0.675643897  | -4.140528278 | 0.000000000 |
| N22  | 2.374882032  | 2.374882032  | 0.000000000 |
| N23  | -2.374882032 | 2.374882032  | 0.000000000 |
| N24  | -2.374882032 | -2.374882032 | 0.000000000 |
| N25  | 2.374882032  | -2.374882032 | 0.000000000 |
| H26  | 4.974134669  | 1.358406283  | 0.000000000 |
| H27  | -1.358406283 | 4.974134669  | 0.000000000 |
| H28  | -4.974134669 | -1.358406283 | 0.000000000 |
| H29  | 1.358406283  | 4.974134669  | 0.000000000 |
| H30  | -4.974134669 | 1.358406283  | 0.000000000 |
| H31  | -1.358406283 | -4.974134669 | 0.000000000 |
| H32  | 4.974134669  | -1.358406283 | 0.000000000 |
| H33  | 1.358406283  | -4.974134669 | 0.000000000 |
| O34  | 0.000000000  | 0.000000000  | 1.53805922  |
| O35  | 0.000000000  | 0.000000000  | -1.53805922 |

TOTAL ENERGY = -1544.1058420340 Hartree

Frequencies ( $\omega_i - \text{cm}^{-1}$ ) and IR intensities ( $A_i - \text{D}^2 \cdot \text{amu}/\text{\AA}^2$ )

| $\omega_i$ | $A_i$   | $\omega_i$ | $A_i$   | $\omega_i$ | $A_i$   | $\omega_i$ | $A_i$   |
|------------|---------|------------|---------|------------|---------|------------|---------|
| 61.57      | 0.00000 | 483.99     | 0.00000 | 906.47     | 0.00000 | 1344.34    | 0.00000 |
| 78.20      | 0.17204 | 488.27     | 0.00000 | 908.44     | 0.00000 | 1359.29    | 0.11215 |
| 80.52      | 0.00000 | 488.27     | 0.00000 | 908.44     | 0.00000 | 1359.29    | 0.11215 |
| 125.20     | 0.00000 | 505.64     | 0.00000 | 909.04     | 0.00000 | 1394.03    | 0.00000 |
| 125.20     | 0.00000 | 672.06     | 0.00000 | 993.39     | 4.63143 | 1469.67    | 0.18031 |
| 196.46     | 0.00000 | 686.46     | 0.00000 | 993.39     | 4.63143 | 1469.67    | 0.18031 |
| 196.46     | 0.00000 | 686.46     | 0.00000 | 998.74     | 0.00000 | 1482.16    | 0.00000 |
| 221.67     | 0.00000 | 704.38     | 0.00000 | 1008.40    | 0.00000 | 1499.59    | 0.00000 |
| 223.54     | 0.00000 | 704.64     | 0.00000 | 1010.04    | 0.00000 | 1504.62    | 0.00000 |
| 237.66     | 0.06518 | 724.36     | 1.75537 | 1035.23    | 0.24829 | 1517.51    | 0.00000 |
| 237.66     | 0.06518 | 738.04     | 0.00000 | 1035.23    | 0.24829 | 1535.31    | 1.72703 |
| 287.54     | 0.36991 | 738.04     | 0.00000 | 1066.71    | 2.00340 | 1535.31    | 1.72703 |
| 287.54     | 0.36991 | 746.45     | 1.38762 | 1066.71    | 2.00340 | 1572.61    | 2.97161 |
| 314.34     | 0.00000 | 746.45     | 1.38762 | 1066.97    | 0.00000 | 1572.61    | 2.97161 |
| 321.07     | 0.06544 | 750.47     | 0.00000 | 1068.52    | 0.00000 | 1585.48    | 0.00000 |
| 336.02     | 0.00000 | 757.79     | 0.00000 | 1068.83    | 0.00000 | 1586.59    | 0.00000 |
| 349.58     | 0.00000 | 799.06     | 0.28031 | 1136.00    | 2.12067 | 3223.22    | 0.00000 |
| 406.33     | 0.41296 | 799.06     | 0.28031 | 1196.76    | 0.21671 | 3223.36    | 0.00000 |
| 406.33     | 0.41296 | 800.77     | 0.00000 | 1196.76    | 0.21671 | 3223.47    | 0.10441 |
| 408.93     | 0.16924 | 801.64     | 0.00000 | 1205.91    | 0.00000 | 3223.47    | 0.10441 |
| 410.22     | 0.00000 | 812.15     | 0.00000 | 1224.84    | 0.00000 | 3243.94    | 1.07993 |
| 410.22     | 0.00000 | 812.15     | 0.00000 | 1288.39    | 0.57259 | 3243.94    | 1.07993 |
| 441.81     | 0.00000 | 817.37     | 0.00000 | 1288.39    | 0.57259 | 3244.02    | 0.00000 |
| 483.80     | 1.46469 | 821.82     | 2.68502 | 1339.95    | 0.00000 | 3244.40    | 0.00000 |
| 483.80     | 1.46469 | 851.24     | 0.00000 | 1343.99    | 0.00000 |            |         |

The electronic absorption spectrum (TDDFT calculation):  $\Delta E$  – excitation energy (eV),  $\lambda$  - wave length (nm),  $f$  – oscillator strength

| State      | $\Delta E$ | $\lambda$ | $f$       | State      | $\Delta E$ | $\lambda$ | $f$       |
|------------|------------|-----------|-----------|------------|------------|-----------|-----------|
| $^1A_{1u}$ | 1.4385     | 861.92    | 0.0000000 | $^1E_g$    | 3.5849     | 345.85    | 0.0000000 |
| $^1A_{1u}$ | 1.4862     | 834.22    | 0.0000000 | $^1E_u$    | 3.7263     | 332.73    | 0.0691578 |
| $^1A_{2u}$ | 1.5006     | 826.23    | 0.0000000 | $^1E_u$    | 3.7544     | 330.23    | 0.1095530 |
| $^1A_{2u}$ | 1.9403     | 639.01    | 0.0096253 | $^1B_{1g}$ | 3.9366     | 314.95    | 0.0000000 |
| $^1A_{2g}$ | 1.9884     | 623.53    | 0.0000000 | $^1E_g$    | 3.9462     | 314.19    | 0.0000000 |
| $^1A_{2g}$ | 2.0561     | 603.00    | 0.0000000 | $^1A_{2u}$ | 3.9639     | 312.78    | 0.0012813 |
| $^1A_{1g}$ | 2.1048     | 589.05    | 0.0000000 | $^1B_{1u}$ | 3.9863     | 311.03    | 0.0000000 |
| $^1E_u$    | 2.5096     | 494.04    | 0.1401842 | $^1A_{2u}$ | 4.0746     | 304.29    | 0.0000000 |
| $^1A_{1g}$ | 2.5508     | 486.06    | 0.0000000 | $^1A_{1u}$ | 4.0769     | 304.12    | 0.0000000 |
| $^1E_g$    | 3.0834     | 402.10    | 0.0000000 | $^1E_u$    | 4.2382     | 292.54    | 0.4114700 |
| $^1E_u$    | 3.3130     | 374.23    | 0.1224442 | $^1B_{2g}$ | 4.2458     | 292.02    | 0.0000000 |
